1 Title: Evolution of andrenine bees reveals a long and complex history of faunal interchanges  
2 between the Americas during the Mesozoic and Cenozoic

3

4 Authors: Kelli S. Ramos<sup>1\*</sup>, Aline C. Martins<sup>2</sup>, Gabriel A. R. Melo<sup>3</sup>

5

6 <sup>1</sup> *Museu de Zoologia, Universidade de São Paulo, Av. Nazaré 481, CEP 04263-000, São*  
7 *Paulo, Brazil.*

8 <sup>2</sup> *Department of Zoology, University of Brasilia, 70910-900, Brasilia, Distrito Federal,*  
9 *Brazil.*

10 <sup>3</sup> *Department of Zoology, Federal University of Paraná, PB 19020, 81531-980, Curitiba,*  
11 *Paraná, Brazil.*

12 \* Corresponding author: Museu de Zoologia, Universidade de São Paulo, Av. Nazaré 481,  
13 CEP 04263-000, São Paulo, Brazil; E-mail: [kellisramos@gmail.com](mailto:kellisramos@gmail.com)

14

15 ABSTRACT

16 Bees are presumed to have arisen in the early to mid-Cretaceous coincident with the  
17 fragmentation of the southern continents and concurrently with the early diversification of the  
18 flowering plants. Among the main groups of bees, Andreninae sensu lato comprise about  
19 3000 species widely distributed with greatest and disjunct diversity in arid areas of North  
20 America, South America, and the Palearctic region. Here, we present the first comprehensive  
21 dated phylogeny and historical biogeographic analysis for andrenine bees, including  
22 representatives of all currently recognized tribes. Our analyses rely on a dataset of 106 taxa  
23 and 7952 aligned nucleotide positions from one mitochondrial and six nuclear loci.  
24 Andreninae is strongly supported as a monophyletic group and the recovered phylogeny  
25 corroborates the commonly recognized clades for the group. Thus, we propose a revised tribal

26 classification that is congruent with our phylogenetic results. The time-calibrated phylogeny  
27 and ancestral range reconstructions of Andreninae reveal a fascinating evolutionary history  
28 with Gondwana patterns that are unlike those observed in other subfamilies of bees.  
29 Andreninae arose in South America during the Late Cretaceous around 90 Million years ago  
30 (Ma) and the origin of tribes occurred through a relatively long time-window from this age to  
31 the Miocene. The early evolution of the main lineages took place in South America until the  
32 beginning of Paleocene with North American fauna origin from it and Palearctic from North  
33 America as results of multiple lineage interchanges between these areas by long-distance  
34 dispersal or hopping through landmass chains. Overall, our analyses provide strong evidence  
35 of amphitropical distributional pattern currently observed in Andreninae in the American  
36 continent as result at least three periods of possible land connections between the two  
37 American landmasses, much prior to the Panama Isthmus closure. The andrenine lineages  
38 reached the Palearctic region through four dispersal events from North America during the  
39 Eocene, late Oligocene and early Miocene, most probably via the Thulean Bridge. The few  
40 lineages with Afrotropical distribution likely originated from a Palearctic ancestral in the  
41 Miocene around 10 Ma when these regions were contiguous, and the Sahara Desert was  
42 mostly vegetated making feasible the passage by several organisms. Incursions of andrenine  
43 bees to North America and then onto the Old World are chronological congruent with distinct  
44 periods when open-vegetation habitats were available for trans-continental dispersal and at  
45 the times when aridification and temperature decline offered favorable circumstances for bee  
46 diversification.

47

48 *Keywords:* Amphitropical distribution, Andrenidae, diversity, biogeography, macroevolution,  
49 phylogeny.

50

## 51 **1. Introduction**

52 Bees constitute a well-established clade of pollen-feeding Hymenoptera presumed to  
53 have arisen during the Early to mid-Cretaceous approximately 113-132 Ma (million years  
54 ago) (Cardinal and Danforth, 2013). Their origin coincides with the end of the Gondwana  
55 breakup and the early diversification of eudicots, the major group of flowering plants  
56 (Cardinal and Danforth, 2013). Currently presenting a worldwide distribution and about  
57 20,000 described species (Ascher and Pickering, 2020), bees have been hypothesized to have  
58 originated in the Southern Hemisphere, more specifically, in the xeric interior of Gondwana  
59 (Michener, 1979; Litman et al., 2011; Hedtke et al., 2013). Over the last 20 years, much  
60 progress has been made on our understanding of the origin and evolution of bees mainly due  
61 to the use of molecular data and fossil information combined with statistical phylogenetic  
62 methods to reconstruct bee phylogenies at different taxonomic levels (see Danforth et al.,  
63 2013, for a review). Among the main groups of bees, the Andreninae remain the most poorly  
64 understood lineage in terms of phylogenetic relationships of its supraspecific taxa and  
65 biogeographic history (Danforth et al., 2013).

66 In the present work we focus on the phylogenetic and biogeographic history of  
67 andrenine bees. This group provides an excellent system for exploring historical  
68 biogeographic patterns of biotic interchanges that took place during the Cenozoic mainly  
69 between the North and South America regions. Andreninae constitute a well-established clade  
70 of bees with about 3,000 species that represent over 15% of all bee diversity (Ascher and  
71 Pickering, 2020) and diverged from the clade (Halictinae (Stenotritinae + Colletinae)), around  
72 90 Ma in the late Cretaceous (Cardinal and Danforth, 2013; Sann et al., 2018). The subfamily  
73 is widely distributed on all continents, except Australia and tropical Asia, and are  
74 exceptionally diverse in the temperate and xeric parts of the Western Hemisphere (Michener,  
75 2007). Among the 61 known genera of andrenine, the New World fauna encompasses around

76 45 genera, with 31 of them found only in South America. Outside the Americas, Andreninae  
77 have a smaller genus-level diversity, with 14 genera reported for the Palearctic region and 5 in  
78 the Afrotropics.

79 Andreninae comprise typically slender medium-sized (6-10 mm long), black with some  
80 yellow marks, and sparsely haired bees, but also robust and hairy bees such as Oxaeini  
81 (Michener, 2007). It has been consistently recovered as a monophyletic group (Ascher, 2004;  
82 Danforth et al., 2004, 2006a, 2006b; Cardinal and Danforth, 2013; Danforth et al., 2013;  
83 Hedtke et al., 2013). The most distinctive morphological character is the subantennal area  
84 defined by two subantennal sutures, with the presence of facial fovea in females and some  
85 males, and the pointed glossa being also useful features in their recognition (Michener, 2007).  
86 The subfamily is remarkable for the high proportion of pollen specialists (oligolectic) species,  
87 each visiting a few species within the same plant family, such as Asteraceae, Cactaceae,  
88 Fabaceae, Malvaceae, Melastomataceae, Onagraceae, Oxalidaceae, Passifloraceae,  
89 Solanaceae, and Turneraceae (Michener, 2007). As far as we know, all andrenine species are  
90 solitary, however, several groups also show communal nesting biology (such as *Andrena*,  
91 *Oxaea*, Perditini, *Panurgus*, and some Protandrenini) (Michener, 2007). The nests are  
92 excavated in the soil with one or a short series of cells at the end of each lateral burrow  
93 radiating from the main burrow. Many species are uni- or bivoltine (i.e. producing one or two  
94 generations per year), especially in seasonally dry areas, but many common polylectic species  
95 are multivoltine. The cleptoparasitic associations of several species of nomadine bees with  
96 andrenines are an interesting and complex system to be investigated (Rozen, 1989). In this  
97 sense, resolution of the phylogenetic relationship among Andreninae lineages is an important  
98 step for understanding the evolution of cleptoparasitism in bees (Rozen, 1992), as well as the  
99 evolutionary history of bee-plant associations (Larkin et al., 2008; Danforth et al., 2013).

100           The classification of Andreninae has a complex history with variable number of  
101 recognized internal taxa. For many years the Andreninae was treated as a slightly less-  
102 inclusive group, excluding Oxaeini (Ascher et al., 2006; Engel, 2015). Members of this tribe  
103 differs considerably from other Andreninae, what lead to its placement as a separate higher  
104 taxon based on adult and larval morphology (e.g. Michener, 1944; Rozen, 1964, 1965, 1993;  
105 Hurd and Linsley, 1976; Alexander and Michener, 1995). Ruz (1986, 1991) was the first to  
106 investigate phylogenetic relationships among genera of the panurgine line, followed by Patiny  
107 (1999), who analyzed the relationship among the Old-World members of panurgine based on  
108 adult morphological characters proposing six tribes: Panurgini, “Camptopoeumini”,  
109 Panurginini, Mermiglossini, Melitturgini, and “Paramelittergini”. The forms included in this  
110 arrangement were classified into two tribes (Panurgini and Melitturgini) by Michener (2000,  
111 2007), a proposal that was largely followed by subsequent authors. Later, Ascher (2004)  
112 analyzed the whole Andreninae using morphological (adult and larvae) plus EF-1 $\alpha$  (F2 copy)  
113 sequences, only partially published (in Rozen, 2003) in order to establish the phylogenetic  
114 relationship of the enigmatic Nolanomelissini.

115           Our understanding of the phylogenetic relationships among andrenine bees remains  
116 fragmented due to limited taxon sampling mainly from South America – the richest region in  
117 diversity of supra specific taxa. Additionally, a global biogeographic analysis based on a well-  
118 resolved fossil calibrated phylogeny of the subfamily has not yet been attempted thus far.  
119 Thus, the primary goal of the work is to provide a solid phylogenetic framework with special  
120 emphasis on the New World, as an important step to establish a stable classification of the  
121 Andreninae and to the understanding of their evolution through the Cenozoic. This is the first  
122 time the monotypic tribe Protomelitturgini has been included in a molecular phylogenetic  
123 work. The current study provides information to understand the ancient diversification that  
124 took place in South America and the complex biogeographic scenario and evolutionary

125 factors that have produced the biotic interchange between the warm areas of the Americas  
126 during the Mesozoic and Cenozoic.

127

## 128 **2. Material and methods**

### 129 *2.1. Taxon and molecular sampling*

130 The taxon sampling comprises 91 species of the subfamily Andreninae sensu lato,  
131 representing all currently recognized suprageneric taxa and the main geographical  
132 occurrences within the subfamily. We follow the classification of Melo and Gonçalves (2005)  
133 for the main lineages of bees, treated as subfamilies of a single family (Apidae sensu lato),  
134 and Moure et al. (2012) for American taxa of Andreninae; in the case of Old-World taxa, we  
135 use the subtribes of Ascher and Engel (2017) at tribal level, as originally proposed by Patiny  
136 (1999). According to the classification adopted here, Andreninae is subdivided into the  
137 following extant tribes: Andrenini, Euherbstiini, Calliopsini, Neffapini, Melitturgini,  
138 Mermiglossini, Nolanomelissini, Oxaeini, Panurgini, Panurginini, Perditini, Protandrenini,  
139 and Protomelitturgini. The higher-level bee phylogenies indicate a large clade uniting all the  
140 short-tongued subfamilies (except Melittinae) (Danforth et al., 2006a, 2006b; Cardinal and  
141 Danforth, 2013; Danforth et al., 2013; Hedtke et al., 2013), thus we choose fifteen terminals  
142 to represent the subfamilies from this clade: Colletinae (7 spp.), Halictinae (6 spp.) and  
143 Stenotritinae (2 spp.). Attention to the choice of species was taken in order to more accurately  
144 place fossil calibration points and to maximize morphological diversity and geographic  
145 distribution for the ancestral area reconstruction. In total, 106 taxa were included in the  
146 analyses, as described in Supplementary Tables S1-S2 along with taxonomy, collection site,  
147 voucher information, and GenBank accession numbers (GenBank accession numbers will be  
148 indicated upon this manuscript acceptance).

149 Molecular sequence data were generated for this study fulfilling a huge gap of South  
150 American andrenine bees in GenBank. Most newly sequenced specimens were field-collected  
151 by us or obtained through donation or loans from other researchers and institutions (see  
152 Acknowledgments). In addition, sequence data were obtained from the databases of Genbank  
153 and BOLD (Barcode of Life Data System) mostly from Ascher et al. (2001), Ascher (2003,  
154 2004), Danforth et al. (2006a, 2006b), Larkin et al. (2006), Almeida and Danforth (2009),  
155 Cardinal and Danforth (2013), and Packer and Ruz (2017). Total DNA was mostly isolated  
156 from bees preserved in EtOH, but also from pinned museum specimens collected up to twelve  
157 years before processing. Muscular tissue was taken from thorax or legs and the DNA was  
158 extracted using the Qiagen DNeasy blood and tissue extraction kit, following the  
159 manufacturer's protocol. In the case of museum species, the whole body was maintained in an  
160 insect relaxing chamber for 24-48 hours prior to extraction following the protocol of  
161 Evangelista et al. (2017) for museum specimens, using the same extraction kit. Voucher  
162 specimens of the newly generated sequences are housed in the DZUP – Entomological  
163 Collection “Jesus Santiago Moure” at Federal University of Paraná, Brazil, or at their home  
164 institutions (Supplementary Tables S1-S2).

165 The selected regions comprise four nuclear protein-coding genes: elongation factor-1 F2  
166 copy (EF-1a), long-wavelength rhodopsin (opsin), RNA polymerase (poly) and wingless  
167 (wg); two nuclear ribosomal RNA loci: large subunit 28S rRNA (28S) and 18S rRNA (18S);  
168 and one mitochondrial protein-coding gene: cytochrome c oxidase subunit I (COI). These  
169 genes have provided robust results for several phylogenetic studies of bees at distinct levels of  
170 relationships. Newly generated sequences refer only to EF-1a (650 base pairs (bp)), wingless  
171 (500 bp), and 28S rRNA (700 bp). Primer information and PCR conditions can be found in  
172 electronic supplementary material (Table S3). PCR success was examined by gel  
173 electrophoresis on 1% agarose gel and PCR products were purified and sequenced in forward

174 and reverse directions by Macrogen Inc. (South Korea). Sequence assembling was generated  
175 with the Staden Package (Staden et al., 2000). Chromatogram quality evaluation and  
176 corrections were done in BioEdit v5.0.9 (Hall, 1999).

177 All genes were separately aligned in MAFFT v. 7 (Katoh et al., 2019) with default  
178 parameters: gap opening penalty = 1.53; offset value = 0. The alignment of the protein coding  
179 genes EF-1a and opsin relied on the LINS-i strategy, which is recommended for sequences  
180 with multiple conserved domains and long gaps. The alignment of the 18S rRNA, wingless  
181 and COI relied on the G-INS-i strategy, recommended for sequences with a global homology.  
182 The ribosomal 28S rRNA was aligned based on its secondary structure using the Q-INS-i  
183 algorithm. Minor adjustments were made by eye in Geneious, and we made sure that the  
184 introns/exon boundaries of EF-1a and opsin were maintained. Sequences from the seven gene  
185 fragments were concatenated in Sequence Matrix v. 1.7.8 (Vaidya et al., 2010). The final  
186 number of aligned nucleotides used in the analyses was 7952 base pairs in length (EF-1a:  
187 1946 bp; opsin: 1494 bp; wg: 512 bp; poly: 842 pb; 28S rRNA: 1714 bp; 18S rRNA: 786 bp;  
188 COI: 658 bp).

189

## 190 *2.2. Phylogenetic analysis and divergence time estimation*

191 All genes were concatenated into a single matrix subdivided as follows: introns and  
192 exons of the protein coding regions EF-1a and opsin, poly, wg, COI, 28S rRNA, and 18S  
193 rRNA totalizing 16-character sets. The search for the best partitioning scheme and models of  
194 DNA substitution was performed in PartitionFinder v. 2 (Lanfear et al., 2017) based on the  
195 Bayesian Information Criterion and the algorithm greedy (see Supplementary Table S4 for  
196 specific information of data partition and their best fit models). The phylogenetic tree  
197 searches were carried out using the concatenated matrix with nine data partitions under  
198 maximum likelihood and Bayesian inferences. Maximum likelihood analysis was performed



199 in RaxML (Stamatakis, 2006) in the CIPRES server (Miller et al., 2011). Simultaneous  
200 bootstrap analyses with 1000 replicates were conducted to evaluate node support. Bayesian  
201 phylogenetic tree searches were conducted in MrBayes v. 3.2. (Ronquist et al., 2012) in  
202 CIPRES. The Markov chain Monte Carlo (MCMC) was run for 20 million generations  
203 sampled every 1000<sup>th</sup> generation. The stationarity of all parameters and convergence of both  
204 runs were accessed in Tracer v. 1.7.1 (Rambaut et al., 2018). A 25% burn-in was applied and  
205 a 50% majority rule consensus was computed with the remaining trees in TreeAnnotator (part  
206 of BEAST 2.0 package, Bouckaert et al., 2014). Resulting ML and Bayesian trees were  
207 visualized and edited in FigTree v. 1.4.4 (Rambaut, 2016).

208         Divergence times were estimated in a Bayesian framework using BEAST 2 (Bouckaert  
209 et al., 2014) by employing the same partition scheme and models of phylogenetic analyses.  
210 Four bee fossils were used to calibrate the Andreninae tree, two belonging to this subfamily  
211 and the others to Halictinae and Colletinae. Compression fossils attributed to *Andrena* from  
212 the Eocene of Florissant, Colorado (Priabonian Age: 37.2–33.9 Ma) were used to calibrate the  
213 node of extant *Andrena* species. There are four species from Florissant deposit attributed to  
214 *Andrena*: *A. grandipes* Cockerell, 1911; *A. hypolitha* Cockerell, 1908; *A. percontusa*  
215 Cockerell, 1914 and *A. sepulta* Cockerell, 1906. Since the descriptions by Cockerell, their  
216 identity has not been much investigated, but all have been undoubtedly attributed to the  
217 megadiverse genus *Andrena*. For this point, a lognormal distribution prior was applied with  
218 offset = 34, stdev = 0.623 and Mean = 1.8, corresponding to a minimum bound of 34 Ma,  
219 median value of 40 and 95% quantile of 50. *Heterosarus eickworti* Rozen, 1996 from the  
220 Miocene Dominican amber (20.43–13.65 Ma) was used to calibrate the node uniting the two  
221 extant species included in our study. The crown group of *Heterosarus* was given a lognormal  
222 distribution with offset 14, stdev = 0.432 and M = 1.8, corresponding to a minimum bound of  
223 14 Ma, median value of 20, and 95% quantile of 26.31. Two other species from Dominican

224 amber, *Chilicola (Hylaeosoma) gracilis* Michener and Poinar, 1996 and *Chilicola*  
225 *(Hylaeosoma) electrodominicana* Engel, 1999, were attributed to the crown group of  
226 *Chilicola* (Colletinae, Xeromelissini), following the same prior used in *Heterosarus*.  
227 *Electrolictus antiquus* Engel, 2001 from the Eocene Baltic amber was used to calibrate the  
228 stem group of Halictini (in Halictinae) given a lognormal distribution prior with the same  
229 parameter as the *Andrena* fossils, since the Baltic amber has also a Priabonian age. All  
230 geological ages attributed to the fossils mentioned here were retrieved from Fossilworks  
231 (Behrensmeyer and Turner, 2013).

232 A normal prior distribution was attributed to the crown age of Andreninae+(Colletinae,  
233 Halictinae) based on previous broader age estimates for Hymenoptera (Aculeata): from  
234 Branstetter et al. (2018) (89.3 Ma, 95% HPD: 76.66-100.17 Ma) and Peters et al. (2017) (99,  
235 95% HPD 82-118). An average value between these two estimates was calculated and the  
236 calibration point was given a normal distribution, offset 94, sigma 2.5 and mean 1 (5%  
237 quantile 90.1, 95% 99.9). The tribes Protandrenini and Mermiglossini were constrained to be  
238 monophyletic based on the Maximum Likelihood and Bayesian analyses, which consistently  
239 recovered these clades. Supplementary Figure S1 depicts all points of fossil calibration,  
240 secondary calibration and monophyletic constraints. Substitution and clock models were  
241 unlinked among partitions, but trees were linked. A Yule speciation model was used as tree  
242 prior. Markov chain Monte Carlo (MCMC) searches were conducted for  $100 \times 10^6$  generations  
243 sampled every 10,000 generations with the first 25% discarded as burn-in. Convergence and  
244 stationarity of the runs were accessed in Tracer v 1.7.1 (Rambaut et al., 2018) using the ESS  
245 scores. The final tree was created in TreeAnnotator (both part of BEAST 2 package).  
246 Resulting maximum clade credibility tree was visualized and edited in FigTree v. 1.4.4  
247 (Rambaut, 2016). All trees with associated data matrix will be deposited in TreeBASE upon  
248 manuscript acceptance.

249

250 *2.3. Ancestral range estimation*

251 We were interested in illuminating the biogeographic history of Andreninae and  
252 identifying their most probable ancestral range and the events of dispersal between the New  
253 World and the Old World and between North and South America. For achieving this purpose,  
254 we conducted an ancestral range estimation analysis using five biogeographically relevant  
255 regions representing the total distribution of Andreninae and outgroups: A. South America, B.  
256 North America, C. Palearctic, D. Afrotropical and E. Australian. The Palearctic is here used in  
257 broad sense, including some extralimital elements whose distributions extend to the Oriental  
258 region. Geographical occurrences that could be assumed to be secondary were considered  
259 biogeographically uninformative. For example, the species-rich genus *Andrena* was  
260 considered here as occurring only in North America and in the Palearctic region, in spite of  
261 known geographic records in the Neotropics, Afrotropics and Oriental region, since its  
262 presence in these latter regions has been attributed to younger clades (Pisanty et al., 2021).  
263 Biogeographic coding for *Melitturga* considered the known distribution of the whole genus,  
264 even though we only sampled palearctic species.

265 Ancestral ranges of Andreninae were estimated using R package BioGeoBEARS  
266 (Matzke, 2013, 2014) comparing different maximum likelihood versions of three classic  
267 biogeographic methods: DEC (Dispersal-Extinction-Cladogenesis: Ree and Smith, 2008),  
268 BayArea (Bayesian Inference of Historical Biogeography for Discrete Areas: Landis et al.,  
269 2013) namely BAYAREALIKE, and DIVA (Dispersal-Vicariance Analysis: Ronquist, 1997)  
270 namely DIVALIKE. The maximum clade credibility tree derived from the BEAST analysis  
271 was used as input and each terminal taxon was coded for presence/absence in the five  
272 geographic areas (Supplementary Table S5). We applied a dispersal multipliers matrix to give  
273 different probabilities for different events of dispersal between continents. Dispersals

274 between, for example, South America and Africa, which is very implausible for Andreninae  
275 bees after Gondwana breakup, were given a 0 probability; while reasonable events, for  
276 example well-documented long-distance dispersals between South and North America, before  
277 the closure of the Panama Isthmus, were given a 1 probability. We assessed the overall fitness  
278 of the models with likelihood-ratio tests and AIC values.

279

### 280 **3. Results**

#### 281 *3.1. Phylogenetic Relationships and Divergence Time Estimation*

282 We assembled the largest molecular dataset for andrenine bees up to date: our final  
283 matrix contains 7952 nucleotides and 106 taxa, comprising approximately 70% of the  
284 currently recognized genera in Andreninae *sensu lato*. The monophyly of most tribes and  
285 many of their relationships are well-supported based on bootstrap proportions and Bayesian  
286 posterior probabilities (i.e. node supports higher than  $\geq 70\%$  ML bootstrap and  $\geq 98\%$   
287 Bayesian posterior probability). Figure 1 and Supplementary Figure S2 depict the phylogeny  
288 of Andreninae recovered by ML and Bayesian inference, respectively. Figure 2 and  
289 Supplementary Figure S3 show the fossil-calibrated tree and ages for main nodes and related  
290 95% highest posterior probability intervals are listed in Table 1.

291 All analyses recovered the monophyly of Andreninae *sensu lato* with high support. The  
292 divergence time estimation indicates that Andreninae diverged from the clade Halictinae  
293 (Colletinae, Stenotritinae) in the Late Cretaceous and evolved rapidly soon afterwards,  
294 considering the age of 96 (91–101) Ma for the crown group. Most andrenine tribes were  
295 recovered as monophyletic with maximum support, except for tribes Melitturgini (99 BPP,  
296 72% BS) and Panurgini (100 BPP, 88% BS) and the not well supported Protandrenini and  
297 Mermiglossini. Furthermore, the position of all tribes agrees between ML and BI, expect for  
298 Panurginini and Mermiglossini.

299           The basalmost divergence within Andreninae involves two major clades, both  
300           containing widespread species-rich subclades. The first split corresponds to a clade formed by  
301           the mainly Holarctic species-rich tribe Andrenini and an endemic Chilean group, the  
302           Euherbstiini originated around 73 (59–86) Ma, in the Late Cretaceous. The monophyly of  
303           Andrenini is recovered encompassing the monospecific genus *Alocandrena*, endemic to Peru,  
304           as sister group of the speciose *Andrena*, a genus widely distributed in the Holarctic region.  
305           The second major clade in Andreninae contains a series of tribes, involving both New- and  
306           Old-World elements. The base of this clade contains a grade with two New World tribes, the  
307           Oxaeini and the Nolanomelissini, which have diverged from the remaining tribes quite early  
308           in the Late Cretaceous. Oxaeini is an ancient lineage, having diverged in the Campanian  
309           period (~85 Ma), but whose crown is estimated to be much younger. Nolanomelissini, a  
310           monospecific group from Chile, is very distinctive and diverged from the panurgine line (see  
311           below) around 77 (67–87) Ma.

312           The remaining tribes of this second major clade form a group treated as the Panurginae  
313           in Michener's classification and that we refer here as the panurgine line. This large  
314           assemblage contains Calliopsini, splitting at the base as sister group of the large clade formed  
315           by Protandrenini, Protomeliturcini, Perditini, Melitturgini, Mermiglossini, Neffapini,  
316           Panurginini and Panurgini. The divergence between Calliopsini and the other tribes of the  
317           panurgine line is estimated to have occurred at 69 (60–79) Ma, while the crown age of  
318           Calliopsini is 20 million years younger (Fig. 2 and Table 1). The relictual tribe  
319           Protomeliturcini, endemic to the dry areas of northeastern Brazil, is recovered with strong  
320           support as sister clade of Protandrenini. The monophyly of Protandrenini is confirmed,  
321           although with low support, excluding the monotypic genus *Neffapis* which proved to be  
322           phylogenetically related to the Panurgini. Within Protandrenini, the North American genera  
323           *Heterosarus*, *Protandrena*, *Pseudopanurgus* and *Pterosarus* were shown to form a clade that

324 diverged from de South American genera in the early Oligocene, around 33 (26–41) Ma (Fig.

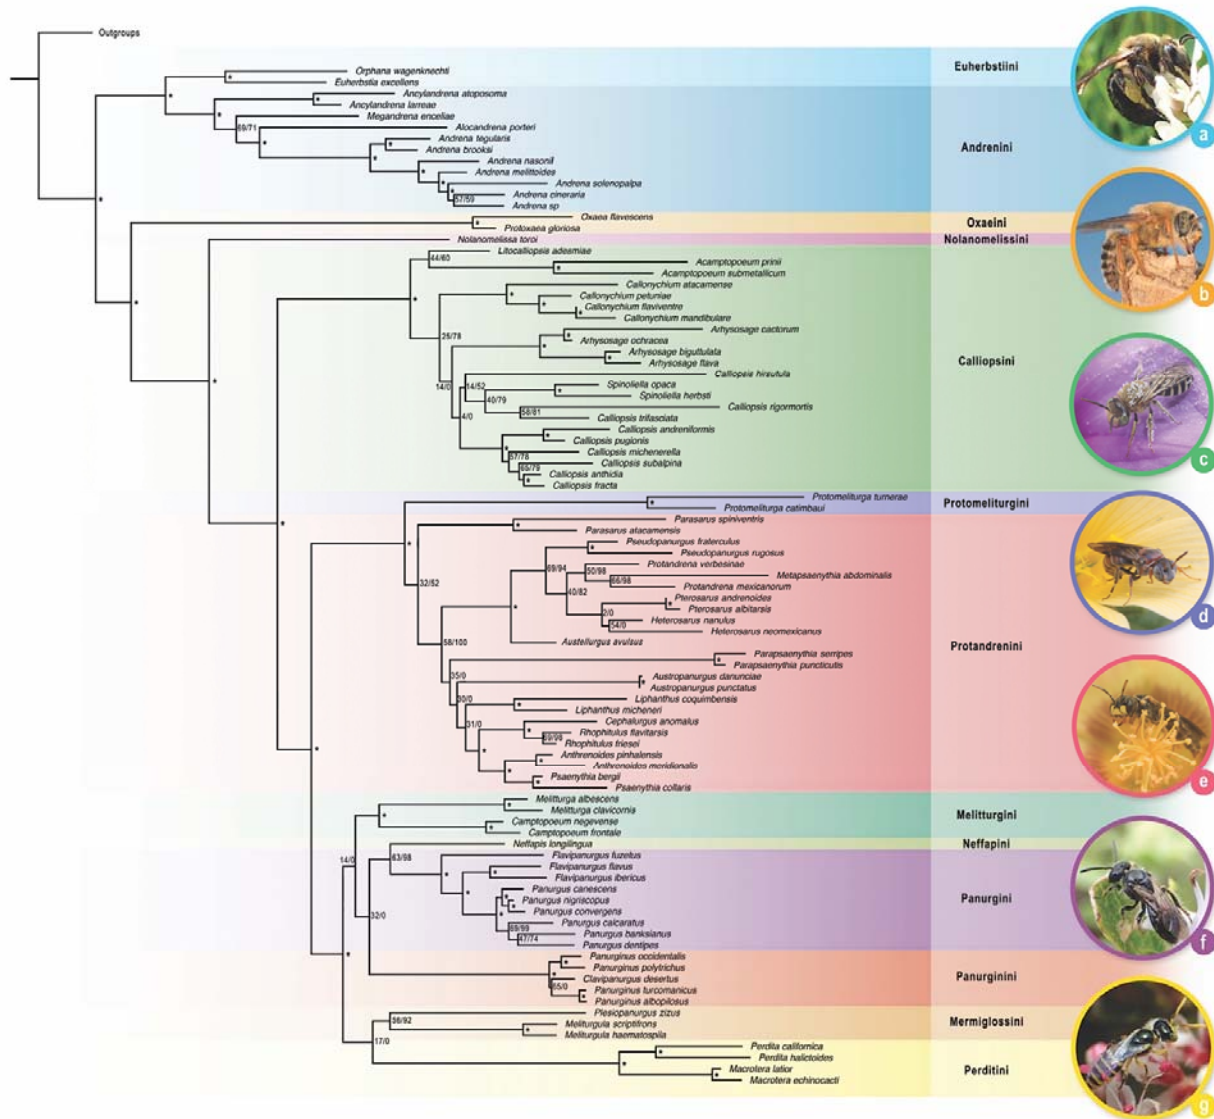

325 2).

326 FIGURE 1. Phylogenetic relationships among 91 species of Andreninae bees resulting  
 327 from a Maximum Likelihood analysis of concatenated data set of the following seven gene  
 328 loci: elongation factor-1a F2 copy, long wavelength rhodopsin, wingless, RNA polymerase II,  
 329 28S rRNA, 18S rRNA, and cytochrome c oxidase subunit I. Complete tree of Maximum  
 330 likelihood and Bayesian analysis are shown as Figure S1 and S2, respectively. Maximum  
 331 likelihood bootstrap support (BS) and Bayesian posterior probability (BPP) values are shown  
 332 at nodes. Clade support  $\geq 98\%$  BPP and  $\geq 70\%$  BS is indicated by asterisk on subtending node.

333 (a) *Andrena vicina*, female. (b) *Oxaea* sp., male. (c) *Acamptopoeum prinii*, male. (d)  
334 *Protomeliturga catimbaui*, female. (e) *Cephalurgus anomalus*, male. (f) *Panurginus* sp.,  
335 female. (g) *Perdita rhois*, male. Photo credits: Tom Barnes (a, f, g); Julio Pupim and Adriana  
336 Tiba (b, c, e); Clemens Schindwein (d).

337

338 The remaining tribes of the panurgine line form a large clade distributed in the  
339 Afrotropical (Mermiglossini), Nearctic (Perditini and Panurginini), and Palearctic (Panurgini,  
340 Panurginini and Melitturgini) regions, except for Neffapini, a monotypic tribe known only  
341 from northern Chile. Phylogenetic relationships among these tribes remain somewhat  
342 uncertain, varying to some degree depending on the method used to analyze the data,  
343 probably due to the short length of the involved branches (Fig. 1 and Supplementary Fig. S1).  
344 The sister-group relationship between Neffapini and Panurgini is recovered in all analyses  
345 (79% BS, 100 BPP) and their crown age estimates correspond to about 44 (28–50) Ma.

346 Our analyses recovered the monophyly of all non-monotypic genera, except *Calliopsis*  
347 (*Calliopsini*) and *Heterosarus* (*Protandrenini*). This last one was placed in a trichotomy with  
348 *Pterosarus* by the Bayesian analysis, but monophyletic in the ML results. *Calliopsis* is  
349 paraphyletic, with the species endemic to South America forming a clade distantly related to  
350 those from the Nearctic region. Most of the genera in Andreninae (~65%) had their origin in  
351 the Miocene (Fig. 2).

352

353 TABLE 1. Divergence time estimates for crown and stem groups of most relevant clades  
354 of Andreninae bees. Values in parentheses refers to 95% Highest Posterior Density intervals.  
355 Ages in million years (My).

| Clade                               | Crown age  | Stem age    |
|-------------------------------------|------------|-------------|
| Andreninae                          | 91 (82–99) | 96 (91–101) |
| Andrenini + Eueherbstiini           | 72 (59–86) | 91 (82–99)  |
| Andrenini                           | 61 (51–74) | 72 (59–86)  |
| <i>Alocandrena</i> + <i>Andrena</i> | 50 (40–58) | 55 (45–65)  |
| Eueherbstiini                       | 35 (11–61) | 72 (59–86)  |



|                                   |            |            |
|-----------------------------------|------------|------------|
| Oxaeini                           | 11 (2–23)  | 84 (75–94) |
| Nolanomelissini                   | -          | 76 (67–86) |
| Calliopsini                       | 48 (37–59) | 69 (59–79) |
| <i>Calliopsis</i> (North America) | 20 (12–31) | 42 (32–53) |
| Protomeliturgini + Protandrenini  | 53 (43–62) | 63 (53–72) |
| Protomeliturgini                  | 20 (8–34)  | 53 (43–62) |
| Protandrenini                     | 48 (39–57) | 53 (43–62) |
| Protandrenini (North America)     | 28 (22–34) | 33 (25–41) |
| Holarctic-Afrotropical clade*     | 56 (46–65) | 63 (53–72) |
| Melitturgini                      | 39 (26–51) | 50 (38–58) |
| Mermiglossini                     | 34 (21–47) | 42 (32–52) |
| Neffapini                         | -          | 43 (28–50) |
| Neffapini + Panurgini             | 43 (28–50) | 50 (38–58) |
| Panurgini                         | 37 (19–40) | 43 (28–50) |
| Panurginini                       | 14 (7–21)  | 48 (38–59) |
| Perditini                         | 23 (14–32) | 42 (32–52) |

\* It includes also the Chilean tribe Neffapini; the whole group could be referred as the supertribe Panurgidi Leach

356

### 357 *Ancestral Range Estimation*

358       The model DEC yielded the highest likelihood and best AICc scores for ancestral range  
359 estimation for the Andreninae phylogeny. Statistical results for all three applied models are  
360 given in Supplementary Table S6. Ancestral range estimates plotted in the Maximum Clade  
361 Credibility tree are show in Figure 2, for the most important nodes, and in Supplementary  
362 Figure S3 for all nodes. The reconstructed scenario shows unequivocally that the most recent  
363 common ancestor (MRCA) of the subfamily Andreninae originated in South America in the  
364 Late Cretaceous. The early evolution of its main lineages took place in this continent until the  
365 end of the Cretaceous, when the first event of dispersal to North America occurred in the  
366 Maastrichtian involving the lineage that gave rise to the tribe Andrenini. Other incursions  
367 from South to North America and vice-versa involved different lineages in the Eocene within  
368 Andrenini and the panurgine line, and during the Oligocene within Protandrenini and  
369 Calliopsini, with the last two tribes retaining a largely South American distribution. This



370 indicates at least three periods of long-distance dispersal or possible land connections between  
 371 the two continents, much prior to the closure of the Panama Isthmus.

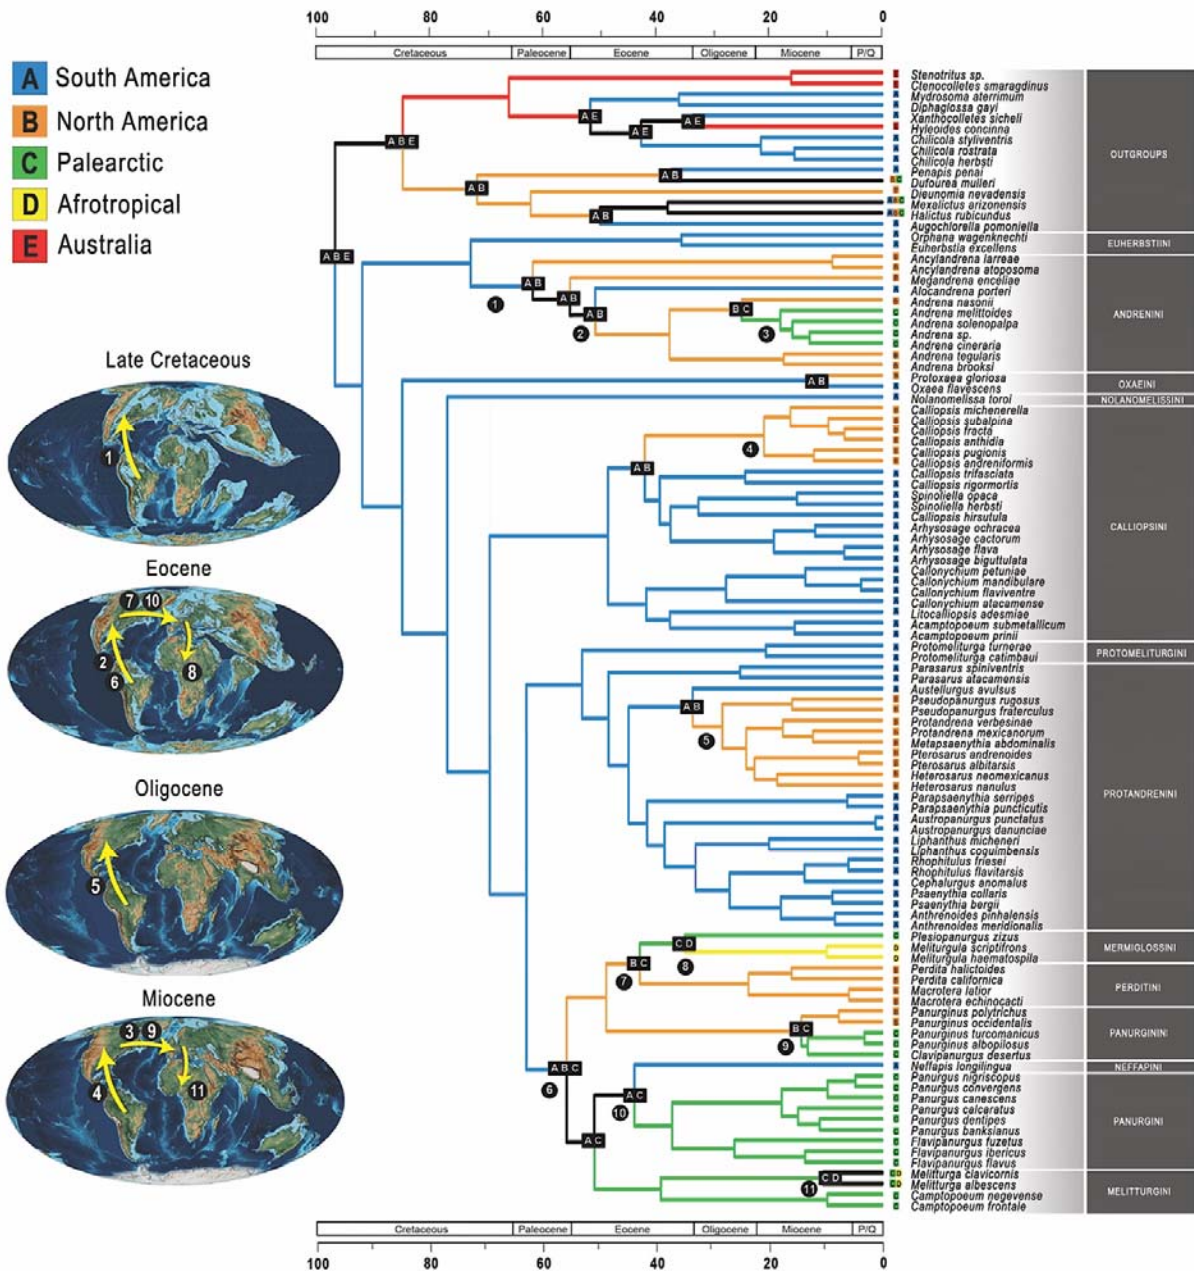

372

373

374 **FIGURE 2.** Maximum likelihood ancestral range estimation in Andreninae, using the best  
 375 model DEC (dispersal-extinction-cladogenesis model) implemented in BioGeoBEARS. The  
 376 pie diagrams at nodes show the relative probability of the possible states (areas or  
 377 combinations of areas). Color boxes show the distribution of each taxa within the clade. Black  
 378 boxes represent nodes at which more than an ancestral area was recovered. Black circles

379 represent nodes at which lineage-interchange events may have occurred. Maps adapted from  
380 Scotese (2014).

381

382

## 383 **4. Discussion**

### 384 *4.1. Phylogeny and Higher Classification of Andrenine Bees*

385       Andreninae is recovered as a well-supported monophyletic group, including the  
386 Oxaeini, as previously proposed (Ascher, 2003, 2004; Danforth et al., 2006a, 2006b; Cardinal  
387 and Danforth, 2013; Hedtke et al., 2013). One of the earliest-branching lineages of  
388 Andreninae corresponds to the already previously recognized clade uniting the tribes  
389 Andrenini and Euerbstiini (Pisanty et al., 2021). Our results show *Alocandrena*, a monotypic  
390 genus from the Peruvian Andes, nested within Andrenini. Due to its unusual morphology in  
391 relation to the other Andrenini, Michener (2000) placed *Alocandrena* in a separate higher  
392 taxon, a classificatory decision corroborated neither by the present study nor by previous  
393 molecular phylogenies (Pisanty et al., 2021). The phylogenetic relationships among the  
394 genera of Andrenini remain controversial. We found *Ancylandrena* (*Megandrena*  
395 (*Alocandrena*, *Andrena*)), while Pisanty et al. (2021) recovered *Andrena* as sister to  
396 *Alocandrena* (*Ancylandrena*, *Megandrena*).

397       In the other basalmost clade of Andreninae, we have Oxaeini recovered as sister to the  
398 remainder of this clade. This tribe is composed of 22 species of quite large and fast hover  
399 flying bees restricted to warmer regions of the Western Hemisphere (Ascher et al., 2006;  
400 Engel, 2015). The tribe is considerably different morphologically from the other Andreninae,  
401 what lead to its placement as a separated family of the traditional classification (e.g. Rozen,  
402 1964, 1965, 1993; Hurd and Linsley, 1976), mainly on the basis of several distinct features of  
403 their mature larvae and adults (Hurd and Linsley, 1976; Michener, 2007; Engel, 2015).  
404 However, broader studies using both larval and adult morphological characters, strongly

405 support the position found here with the group nested within Andreninae sensu lato  
406 (Michener, 1944; Graf, 1966; Rozen, 1993, 1994; Alexander and Michener, 1995; Ascher,  
407 2003, 2004; Danforth et al., 2006a, 2006b; Hedtke et al., 2013; Engel, 2015).

408 The enigmatic species *Nolanomelissa toroi*, known only from the southern border of the  
409 Atacama Desert in Chile, appears as sister to remaining tribes of the panurgine line. This  
410 species is oligolectic on pollen of *Nolana rostrata* (Solanaceae) (Rozen, 2003; Michener,  
411 2007), and has a number of morphological apomorphies, but also shares characteristics with  
412 different tribes of Andreninae making it difficult to assign to a tribe unequivocally (Rozen,  
413 2003). However, our results agree with the placement of *Nolanomelissa* in its own tribe,  
414 Nolanomelissini, as proposed by Rozen and Ascher (in Rozen, 2003). Calliopsini, here  
415 represented by all of its genera (except *Xeranthrena*) and including South American species  
416 of *Calliopsis* is recovered as monophyletic. Phylogenetic relationships based in adult  
417 morphology have recovered a clade containing the genera *Callonychium*, *Spinoliella*,  
418 *Xeranthrena* and *Arhysosage* excluding *Calliopsis*, *Acamptopoeum* and *Litocalliopsis* (Ruz,  
419 1991; Roig-Alsina and Compagnucci, 2003; Gonzalez et al., 2017). Data on larval  
420 morphology have also supported a close relationship between *Arhysosage*, *Callonychium* and  
421 *Spinoliella* (Rozen, 2013; referred by him as the *Spinoliella* group). Our results, however,  
422 indicate that *Calliopsis* sensu lato belongs to this group and *Spinoliella* makes the large genus  
423 *Calliopsis* paraphyletic.

424 Species of *Calliopsis* are classified in nine subgenera, three of them endemic to South  
425 America and six to North America. Although Ruz (1991) evidenced the monophyly of  
426 *Calliopsis* sensu lato, she highlighted the South American *C. (Liopoeum)* as one of the most  
427 distinctive subgenera, with some species having the female metasomal terga with hair bands  
428 and others with pigmented yellow bands. It seems clear that the genus *Calliopsis* still require  
429 a more thorough phylogenetic investigation, with a broader taxonomic sampling to

430 understand the limits and definitions of the endemic South American subgenera in order to  
431 define their taxonomic status. *Litocalliopsis* was corroborated as a distinct lineage sister to  
432 *Acamptopoeum*, contradicting previous hypothesis proposing it as sister to *Calliopsis* (Roig-  
433 Alsina and Compagnucci, 2003). In fact, these authors have also indicated several  
434 morphological features shared between *Litocalliopsis* and *Acamptopoeum*.

435 Our molecular phylogeny provides a novel sister-group relationship between  
436 Protomeliturgini and Protandrenini with maximum support. Previous hypotheses suggested  
437 Protomeliturgini as close to Perditini and Calliopsini (Ruz, 1986, 1991). Protomeliturgini  
438 contains a single genus with two described species distributed in semiarid areas of  
439 northeastern Brazil and oligolectic in flowers of Turneraceae (Medeiros and Schlindwein,  
440 2003). *Protomeliturga* is easily distinguished from other lineages by the very elongated first  
441 two articles of the labial palpus, strongly curved 2<sup>nd</sup> abscissa of the vein M (basal vein), and  
442 tergum 7 of male strongly curved forward, with a pair of apicolateral teeth (Schlindwein and  
443 Moure, 2005; Michener, 2007).

444 Protandrenini is morphologically heterogenous, therefore not obviously monophyletic,  
445 but was recovered by the present molecular dataset. Our results unequivocally exclude  
446 *Neffapis* from Protandrenini. The placement of *Austellurgus avulsus* (Ramos & Melo, 2006)  
447 as sister to the North American Protandrenini is here reinforced. Michener (2007) gave  
448 *Protandrena* an overly broad scope, recognizing as subgenera the South American species of  
449 *Austropanurgus* and *Parasarus* and North American species of *Heterosarus*, *Metapsaenythia*,  
450 and *Pterosarus*. Yet, *Pseudopanurgus* was also previously recognized in a much broader  
451 sense synonymizing the genera *Heterosarus*, *Pterosarus*, and *Xenopanurgus*, but based on an  
452 incomplete sampling of those lineages. Our results do not provide support to these  
453 propositions, showing *Protandrena* sensu Michener (2007) as polyphyletic with respect to  
454 genera from South America and *Pseudopanurgus* sensu Ascher (2004) paraphyletic in

455 relation to *Protandrena*. We have also found out *Protandrena* sensu stricto paraphyletic to  
456 *Metapsaenythia* as already indicated by both morphological and molecular data (Ascher,  
457 2004; Michener, 2007).

458         Within the panurgine line, we also found a large clade formed by the tribes Neffapini,  
459 Perditini, Mermiglossini, Melitturgini, Panurgini and Panurginini (see below for decision on  
460 classification system). Relationships within this large and heterogeneous clade, containing  
461 both New and Old World taxa, differed somewhat between the analyses, with the alternative  
462 arrangements involving mainly Panurginini and Mermiglossini. The monospecific Neffapini,  
463 the only South American element in this clade, came out as sister-group to the Old World  
464 *Flavipanurgus* and *Panurgus* (Panurgini). *Neffapis*, endemic to Coquimban desert in Chile,  
465 exhibits many unique characters such as the extremely long glossa and third labial palpus and  
466 a minute maxillary palpus with only two palpomeres (Rozen and Ruz, 1995), which led to  
467 difficulties in positioning it within existing tribes. Proposal of a separate tribe for *Neffapis* by  
468 Ascher (in Engel, 2005) is corroborated here, although in a rather different phylogenetic  
469 scenario.

470         Monophyly of Perditini and its two genera, *Perdita* and *Macrotera*, corroborates  
471 morphological phylogenies (Danforth, 1996) and recognition of *Macrotera* as a valid genus  
472 distinct from *Perdita*. This tribe is close to Palearctic and Afrotropical tribes (Patiny, 1999;  
473 Ascher, 2003). The phylogenetic relationships of *Camptopoeum* with *Melitturga* and  
474 *Melitturgula* with *Plesiopanurgus* corroborate the establishment of the tribes Melitturgini and  
475 Mermiglossini, respectively. It is possible that this large clade may also include the intriguing  
476 species *Simpanurgus phyllopodus* (Warncke, 1972), endemic to the Iberian Peninsula and  
477 known only from males. Previous treatments indicated *Simpanurgus* as a subgenus of  
478 *Panurgus* (Michener, 2007) or as *incertae sedis* in relation to the Old-World tribes (Ascher  
479 and Engel, 2017). The inclusion of molecular data from this species, as well as a broader

480 sampling of Old-World elements, would improve our understanding of its position in the  
481 phylogeny of Andreninae.

482 The classification system adopted here for this large clade of the panurgine line gives  
483 tribal status to the main lineages. The systematic position of the genera within this large clade  
484 varies in different papers and differs according to the suprageneric-level classification  
485 adopted (Table 2). A comprehensive background about the distinct classification systems  
486 adopted for these taxa is provided by Ascher and Engel (2017). Here we propose the  
487 following taxonomic arrangements: Mermiglossini include *Plesiopanurgus* and *Meliturgula*,  
488 represented here by a total of three species, and the non-represented genera *Flavomeliturgula*,  
489 *Gasparinahla* and *Mermiglossa*; Melitturgini include *Camptopoeum*, *Melitturga* and the  
490 genera not sampled here *Avpanurgus* and *Borgatomelissa*; Panurgini include *Panurgus* and  
491 *Flavipanurgus*; Panurginini include only *Panurginus*; and Perditini comprise *Macrotera* and  
492 *Perdita*. We disagree from previous classifications that give status of subtribe to these  
493 lineages, as proposed by Ascher (2004), Engel (2005), and Ascher and Engel (2017), based  
494 on the following reasons: (1) We found no evidence for a monophyletic Panurgini sensu lato;  
495 Neffapini would have to be included to make it monophyletic; (2) Use of tribal level  
496 preserves the status of well-known groups, as the Perditini; (3) There is a large amount of  
497 heterogeneity within the clade, surpassing that found in other andrenine lineages, to assemble  
498 them under a single tribe; (4) The first divergences within the clade, dated from the early  
499 Eocene, have ages comparable to those of other lineages given tribal status within the  
500 Andreninae. The classification system adopted here is summarized in Table 2.

501

#### 502 4.2. Early evolution of the Andreninae

503 Our fossil calibrated tree and ancestral area estimation indicate that Andreninae arose in  
504 South America during the Turonian, around 90 Ma in the Late Cretaceous, an age consistent



505 with previous estimates (Cardinal and Danforth, 2013; Sann et al., 2018). The biogeographic  
506 history of Andreninae involved multiple northward transcontinental dispersal events, from  
507 South to North America, with subsequent incursions to the Palearctic region and from there to  
508 the Afrotropics, as a result of lineage interchanges between these landmasses. Our results,  
509 therefore, suggest that the breakup of Gondwana seem to have had minor impact on the early  
510 evolution of Andreninae.

511 Distribution, relationships, and divergence times among andrenine tribes suggest a  
512 pattern of diversification mainly related to historical connections between North and South  
513 America. The andrenine tribes originated during a relatively long time-window between the  
514 Maastrichtian in the Late Cretaceous (crown age of Andrenini: 72 Ma) and the Miocene  
515 (crown age of Oxaeini: 11 Ma). These exchanges between the land masses of the Western  
516 Hemisphere gave rise to what is known as the amphitropical distributional pattern (see  
517 Michener, 1979), which is exhibited by several lineages of Andreninae, as well as many other  
518 New World bee groups.

519 Aside from land connections, dispersal of andrenine bees across Mesoamerica would  
520 have required the availability of suitable habitats. Here we were able to reconstruct a more  
521 specific biogeographic scenario showing the early differentiation of Andreninae taking place  
522 under conditions similar to those prevalent today in the xeric regions of western South  
523 America. Although a large diversity is currently distributed in open vegetation of the  
524 American continent, arid and semiarid regions with Mediterranean climate played an  
525 important role in the diversification of andrenine bees, especially the western portion of South  
526 America (Chile and Argentina) and southwestern North America (Californian deserts and the  
527 desertic regions of the southwestern United States and northern Mexico). The importance of  
528 these areas to the evolution of Andreninae is supported by the occurrence of many endemic  
529 taxa (Michener, 1979; Simpson and Neff, 1985; Turchetto-Zolet et al., 2013). Occurrence of

530 the ancient relictual lineages *Euherbstiini*, *Nolanomelissini* and *Neffapini* west of the Andes  
531 in the southern Atacama and Coquimban deserts of Chile is a further evidence of these areas  
532 as refugia for bees. The complex geological scenario of Andean orogeny, a long process  
533 beginning in the Paleogene, has affected the climate and biodiversity in South America  
534 (Hoorn et al., 2010), favoring a progressive formation of xeric habits along western portions  
535 of South America (Armijo et al., 2015) and acting as a barrier to bee dispersal. This picture of  
536 Andean formation is consistent with our data that shows that the first mountain chain may  
537 have acted as isolation barrier for earlier andrenine lineages as *Euherbstiini*, *Nolanomelissa*,  
538 *Neffapis*, and *Alocandrena*, and also as a strong barrier that prevented the spread of eastern  
539 taxa such as the *Oxaeini*.

540

#### 541 *4.3. Bee faunal interchanges between South and North America*

542 The evolutionary history of the Andreninae involves multiple faunal interchanges  
543 between the South and North Americas in at least three different periods suggesting the  
544 existence of land connections prior to the final closure of the Panama Isthmus in the Miocene.  
545 The time range of the events estimated in our dating analyses is chronologically consistent  
546 with different hypotheses of the geological history of connections between the two large  
547 landmasses of the American continent from the Late Cretaceous onward. Contrary to  
548 Michener's (1979) hypotheses, we found evidence that south-to-north dispersal of bees is  
549 older than the reverse direction.

550 The early divergence between the tribes *Andrenini* and *Euherbstiini* in the Late  
551 Cretaceous involved a geodispersal to North America (Fig. 2, Clade 1). Examples of similar  
552 exchanges during this period have been reconstructed in other insect groups, such as riodinid  
553 butterflies (Espeland et al., 2015), melanopline grasshoppers (Chintauan-Marquier et al.,  
554 2011), and in bees of both eucerine and apine lines (see Martins and Melo, 2016). This



555 exchange event between the Americas, during the Campanian and the Maastrichtian, has been  
 556 named as the First American Biotic Interchange (FABI), and has been originally proposed  
 557 from patterns found in vertebrates (Goin et al., 2012).

558

559 TABLE 2. A comparison of suprageneric-level treatments for Andreninae classification.

| <b>Patiny (1999)</b>                              | <b>Ascher (2004)</b>                                          | <b>Michener (2007)</b>       | <b>Ascher and Engel (2017)</b>                | <b>Present study</b> |
|---------------------------------------------------|---------------------------------------------------------------|------------------------------|-----------------------------------------------|----------------------|
| NT                                                | Andrenini                                                     | Andreninae <sup>1</sup>      | NT                                            | Andrenini            |
| NT                                                | Euherbstiini                                                  | Andreninae                   | NT                                            | Euherbstiini         |
| NT                                                | Oxaeinae                                                      | Oxaeinae                     | NT                                            | Oxaeini              |
| then undescribed                                  | Nolanomelissini                                               | Nolanomelissini              | Nolanomelissini                               | Nolanomelissini      |
| Calliopsini                                       | Calliopsini                                                   | Calliopsini                  | Calliopsini                                   | Calliopsini          |
| Protandrenini                                     | Protandrenini                                                 | Protandrenini                | Protandrenini                                 | Protandrenini        |
| NT                                                | Panurgini: Protomelitturgina                                  | Protomelitturgini            | Protomelitturgini                             | Protomelitturgini    |
| NT                                                | Panurgini: Neffapina                                          | Protandrenini                | Neffapini                                     | Neffapini            |
| Camptopoeumini* <sup>2</sup> ,<br>Melitturgini*   | Panurgini:<br>Camptopoeumina* <sup>2</sup> ,<br>Melitturgina* | Panurgini*,<br>Melitturgini* | Panurgini: Camptopoeina*,<br>Melitturgina*    | Melitturgini         |
| Mermiglossini*,<br>Paramelitturgini* <sup>3</sup> | Panurgini: Mermiglossina*,<br>Melitturgulina*                 | Melitturgini                 | Panurgini: Mermiglossina*,<br>Melitturgulina* | Mermiglossini        |
| Panurgini                                         | Panurgini: Panurgina                                          | Panurgini                    | Panurgini: Panurgina                          | Panurgini            |
| Panurginini                                       | Panurgini: Panurginina                                        | Panurgini                    | Panurgini: Panurginina                        | Panurginini          |
| Perditini                                         | Panurgini: Perditina                                          | Perditini                    | Panurgini: Perditina                          | Perditini            |

560 NT: not treated. \* In part. <sup>1</sup>*Alocandrena* excluded. <sup>2</sup>*Nomen imperfectum* (Engel 2005).

561 <sup>3</sup>Invalid name (Engel, 2001)

562

563 Distinct relative periods of isolation and contact of these landmasses from the  
 564 Cretaceous to the Pleistocene, and its impact on the amphitropical fauna and flora diversity  
 565 have long been a subject of discussion. In this way, the disjunct distribution in the American  
 566 continent implies that Central America served as an important setting for diversification of  
 567 such taxa in the past. Historical connections between North and South America involve a  
 568 complex geodynamic of the Caribbean plate that modulated the relative isolation of such  
 569 areas during distinct geological periods (Iturralde-Vinent and MacPhee, 1999; Ortiz-  
 570 Jaureguizar and Pascual, 2007; Pindell and Kennan, 2009; Woodburne, 2010; Cody et al.,

571 2010; Farris et al., 2011; Giunta and Orioli, 2011; Coates and Stallard, 2013; Bacon et al.,  
572 2013, 2015; Montes et al., 2012, 2015; Cione et al., 2015). Since there is no evidence for an  
573 arid corridor through Central America or a full connection of the North and South landmasses  
574 before the closure of the Panama Isthmus, geodispersal events should be invoked to explain  
575 the diversification of the andrenine bees in the Americas, which perhaps have been facilitated  
576 by transient arid conditions in the Central America terrains.

577         The sister relationships between the Peruvian genus *Alocandrena* and the Holarctic  
578 *Andrena* represent another trans-Caribbean geodispersal event, but estimated here to have  
579 occurred in the Eocene (~50 Ma) (Fig. 2, Clade 2). Pisanty et al. (2021) also recovered an  
580 early Eocene age for the split between *Alocandrena* and their North American relatives and  
581 explained this pattern by long distance wind dispersal through the Central American Seaway,  
582 possibly aided by island hopping. Our results also indicate another ancient dispersal event  
583 taking place at the beginning of the Eocene and involving the South American lineage that  
584 gave rise to a large clade presently distributed in the Nearctic, Palearctic and Afrotropical  
585 regions, but also containing a single South American genus, the Chilean *Neffapis*, nested  
586 within it (Fig. 2, Clade 6). The distribution pattern exhibited by this clade implies  
587 biogeographic scenarios invoking a direct dispersal from South America to the Palearctic  
588 region. Such direct connections are unlike to have occurred during this timeframe and  
589 considering the presence of some elements in the Nearctic region, as well the Chilean lineage,  
590 we presuppose that this ancestral lineage also entered the Old World following a route  
591 through North America. This South America–Palearctic disjunct scenario, however,  
592 presupposes some extinctions in the Nearctic region since only a few lineages of this clade  
593 have North American representatives. Inter-American exchanges during the same time period  
594 in the early Eocene have previously been documented for the bee tribes Halictini and  
595 Sphecodini (Danforth et al., 2004).

596 Additional inter-American exchanges occurring under younger ages have been also  
597 recovered in our study. Within the tribes Calliopsini and Protandrenini, we found a repeated  
598 biogeographic pattern with incursions to North America occurring between 42–28 Ma (late  
599 Eocene to early Oligocene) and 33–20 Ma (early Oligocene to early Miocene), respectively  
600 (Fig. 2, Clades 4 and 5). The tribe Oxaeini also exhibits an amphitropical distribution and  
601 likely represents another dispersal event within this scenario (Fig. 2), but whose divergence  
602 estimation needs further investigation with a more comprehensive taxon sampling.

603 The majority of the most recent and well-documented episodes of multitaxon  
604 interchanges between North and South America occurred after formation of a permanent land  
605 corridor in the Pliocene (~3 Ma). This biogeographic event – the Great American Biotic  
606 Interchange (GABI) – resulted from the rise of the Isthmus of Panama and climatic changes  
607 (mainly glaciations) that allowed many animal groups to cross the Panamanian connection  
608 (Simpson and Neff, 1985; Cody et al., 2010; Goin et al., 2012; Wilson et al., 2014; Cione et  
609 al., 2015). On the other hand, our results support that andrenine bees have migrated during  
610 Oligocene and Miocene along Central America around times when patches of open habitats  
611 might have been available. Similar to the Andreninae, species in the bee genera *Diadasia* and  
612 *Centris* are also associated with arid regions and their evolutionary history endorses a  
613 scenario with prevailing climatic conditions and plant formations adapted to dry conditions in  
614 the connecting areas between the American landmasses (Wilson et al., 2014; Martins and  
615 Melo, 2016). Hines (2008) also suggested that bumblebees may have arrived in South  
616 America in the Miocene crossing Central America when favorable patches of temperate  
617 habitats arose.

618 The GABI was initially characterized by the movement of land mammals between  
619 North and South America which requires a contiguous area for overland migration (reviewed  
620 by Goin et al., 2012, 2015). Several studies suggest that inter-American connections and

621 interchange of organisms, after Eocene age, could have happened earlier than the final closure  
622 of the Isthmus of Panama. Cody et al. (2010) reveal the asynchrony between the evolutionary  
623 history of several animal taxa related to GABI and plant migrations from South to North  
624 America (at least 20 Ma earlier). As observed for plants, northward transcontinental dispersal  
625 events around this same time window have been reconstructed here for the Calliopsini and the  
626 Protandrenini, and have also been found in other bee groups [see Ramírez et al. (2010) for  
627 early Miocene divergences within the orchid-bee genera *Euglossa* and *Eufriesea*, Almeida et  
628 al. (2012) for the colletine *Caupolicana* and *Eulonchopria*, Wilson et al. (2014) for the  
629 emporine genus *Diadasia* and Martins and Melo (2016) for the oil-bee genus *Centris*].

630 Geological favorable scenarios invoked to understand the biotic movements through the  
631 American continent around Oligocene-Miocene include overwater long-distance dispersal  
632 (Michener, 1979; Cody et al., 2010), volcanic island hopping (Iturralde-Vinent and MacPhee,  
633 1999; Sturge et al., 2009) or through emergent peninsulas formed in Central America (Kirby  
634 et al., 2008; Monte et al., 2012, 2015). Although there is still little evidence for an earlier age  
635 for the closure of the Isthmus of Panama sensu stricto as highlighted by O’Dea et al. (2016),  
636 the current biological evidence, including that brought in the present contribution, endorse a  
637 pattern of early interchanges across Central America much before the closure of the Isthmus  
638 of Panama has been completed.

639

#### 640 4.4. Into the Palearctic and Afrotropical regions

641 The evolutionary history of the Andreninae occurring in the Old World is explained by  
642 our data through four dispersal events from North America to the Palearctic region in two  
643 distinct historical periods. Most ancient dispersal movements occurred in the Eocene and  
644 involve the evolutionary history of Mermiglossini, which seems to have derived from a North  
645 American ancestor common to Perditini, and also of the lineage that gave rise to the clade

646 containing Melitturgini, Panurgini and Neffapini. In both cases, the incursions to the  
647 Palearctic region imply a North American MRCA. We also find evidence of a biotic  
648 connection between North America and the Palearctic region during the late Oligocene (~24  
649 Ma) and early Miocene (~14 Ma) indicated by diversification episodes within of the Holarctic  
650 genera *Andrena* and *Panurginus* (Fig. 2, Clades 3 and 8, respectively). The presence of  
651 Panurgini and Panurginini in Eurasia via North America was also early inferred by Michener  
652 (1979) and Ruz (1986).

653 Evidence for these two dispersal pulses among the Northern Hemisphere landmasses  
654 has been previously advocated by Praz and Packer (2014) for the long-tongued bee tribes  
655 Ancylini and Eucerini. These authors reconstructed a first geodispersal event involving the  
656 origin of the clade composed by the genera *Ancyla* and *Tarsalia* reaching the Old World from  
657 the New World during the early Eocene, and a second distinct period of exchanges between  
658 the Eastern and Western Hemispheres in the Miocene involving some eucerine genera.  
659 Intercontinental dispersal events in the opposite direction, i.e. from the Palearctics to the  
660 Nearctics, during Miocene age is also inferred to explain the evolutionary history of  
661 bumblebees (Hines 2008) and honeybees (Engel et al., 2009).

662 Expansion of New World terrestrial biotic elements onto the Old World, through a  
663 North American route, suggests the existence of Northern Hemisphere land bridges with  
664 suitable environmental conditions in distinct ages, such as the Beringia, Thulean and De Geer  
665 land bridges (Sanmartín et al., 2001; Brikiatis, 2014). The Bering route functioned in warm  
666 periods connecting East Asia and North America. The De Geer Bridge chronologically  
667 coincides with the Bering route but connected Eastern North America to Eurasia through the  
668 Greenland to Fennoscandia (Sanmartín et al., 2001). The Thulean Bridge was also an  
669 intercontinental land bridge that connected the Northern Hemisphere via Greenland but  
670 became established well after the interruption of the De Geer route, offering a southerly

671 connection through Greenland, Iceland, Faroe Islands and Scotland. In addition to land  
672 connections, the progressive aridification and temperature decline documented during the  
673 middle Eocene to early Oligocene led to favorable circumstances for bee diversification. This  
674 particular climatic condition that caused the displacement of tropical and subtropical forests  
675 led also to further expansion of temperate savanna-like vegetation to as far north as the  
676 Beringian and North Atlantic Land bridges in North America (Graham, 1999; Cardinal,  
677 2018).

678 As similarly inferred by Praz and Packer (2014) for the tribe Ancylaini, the incursion of  
679 andrenine bees into the Old World during the Eocene possibly occurred through the Thulean  
680 route, taking into account that it implies warmer environmental conditions, due its more  
681 southern position, and its connections to the western Palaearctics where the andrenine bees  
682 are more diverse today. Additional examples of geodispersals related to the Thulean route in  
683 the same period and invoking similar environmental conditions are known from other groups  
684 of organisms (see Praz and Packer, 2014).

685 Afrotropical distribution of *Melitturga* (Melitturgini) and *Meliturgula* (Mermiglossini)  
686 are estimated by our analyses as deriving from two distinct events involving Palearctic  
687 ancestral groups. While the event involving the Melitturgini seems to have taken place during  
688 the Tortonian age in the Miocene (around 10 Ma; 3-18 HPD 95%), that in the Mermiglossini  
689 occurred at a much older age (Fig. 2, Clade 8). Indeed, the scenario within the Mermiglossini  
690 is more complex and involves the Afrotropical genus *Mermiglossa*, not sampled here, known  
691 from Namibia to central East Africa (Ascher and Engel, 2017). *Mermiglossa* is closely related  
692 to *Plesiopanurgus* based on morphological data (Ruz, 1986; Patiny, 1999; Ascher, 2004;  
693 Michener, 2007; Ascher and Engel, 2017) what indicates that its presence in the Afrotropics  
694 derives from an ancient occupation of Palearctic arid areas in northern Africa and the Middle  
695 East by the ancestral lineage of the Mermiglossini.

## 696 **5. Conclusions**

697           In the current study we present the first most comprehensive dated phylogeny to  
698 understanding of the complex evolutionary history of Andreninae bees. We provide molecular  
699 phylogenetic evidence that corroborate the monophyly of several tribes currently recognized  
700 based on morphological evidence. The relationships within the large clade containing the  
701 tribes Neffapini, Melitturgini, Mermiglossini, Perditini, Panurgini and Panurginini remain  
702 poorly resolved and will require further investigation. The reconstructed evolutionary  
703 scenario for the Andreninae sensu lato also provided new insights into the biogeographic  
704 patterns and revealed repeated biotic interchanges between the major landmasses. The early  
705 evolution of the main lineages took place in South America, during the Late Cretaceous, and  
706 extended to the beginning of the Paleocene, with North American lineages originating from  
707 South American relatives. Presence of the clade in the Palearctic region results from multiple  
708 exchanges with North America by long-distance dispersal or hopping through landmass  
709 chains. Our analyses provide strong support for the amphitropical pattern currently observed  
710 in the American continent resulting from at least three periods of possible land connections  
711 between the two American landmasses. The last incursion from South to North America is  
712 reported in the Miocene, much prior to the well documented Panama Isthmus closure.

713

## 714 **CRedit authorship contribution statement**

715 Kelli Ramos: designed research, data analysis, writing - original draft. Aline Martins: data  
716 analysis, writing - review & editing. Gabriel Melo: designed research, data analysis, writing -  
717 review & editing.

718

## 719 **Acknowledgments**

720 We are indebted to several colleagues and museum curators for providing access to bee  
721 specimens used for DNA extraction and assistance on several aspects of this research:  
722 Antonio J. C. Aguiar, Airton T. Carvalho, Arturo Roig-Alsina, Bryan N. Danforth, Danuncia  
723 Urban, Eduardo A. B. Almeida, Gabriel A. R. de Paula, Grazielle Weiss, John L. Neff, Julia C.  
724 Almeida, Luciana Patella, Luis Compagnucci, Olivia Evangelista, Paulo Milet-Pinheiro,  
725 Santiago Plischuk, Simone C. Cappellari, and Walter Boeger. Our thanks to Adriana Tiba,  
726 Clemens Schlindwein, and Julio Pupim for generously allowing us to use their excellent bee  
727 photographs. KSR is very grateful to Daniela M. Takiya, Luis R. R. Faria Jr. and Vitor  
728 Kanamura for their invaluable help and companionship in field expeditions. Special thanks to  
729 Luisa Ruz for all support during KSR visits in Chile and invaluable support to the  
730 development of this research. This work was supported by Coordenação de Aperfeiçoamento  
731 de Pessoal de Nível Superior - CAPES (Finance Code 001 to KSR); National Council for  
732 Scientific and Technological Development - CNPq (grant 158862/2014-7 to KSR,  
733 304053/2012-0 and 309641/2016-0 to GARM); São Paulo Research Foundation - FAPESP  
734 (Grant 2010/17046-5 to KSR); Programa de Capacitação em Taxonomia - PROTAX (Grant  
735 numbers CNPq 440574/2015-3 and FAPESP 2016/50378-8 to KSR); CNPq posdoc  
736 fellowship to ACM.

737

### 738 **Data availability**

739 Supplementary data are provided in Appendix A.

740 Phylogenetic matrix are provided in Appendix B.

741

### 742 **References**

743 Alexander B.A., Michener C.D. 1995. Phylogenetic studies of the families of short-tongued  
744 bees (Hymenoptera: Apoidea). U. Kansas Sci. Bul. 55: 377–424.



- 745 Almeida E.A.B., Danforth B.N. 2009. Phylogeny of colletid bees (Hymenoptera: Colletidae)  
746 inferred from four nuclear genes. *Mol. Phylogenet. Evol.* 50: 290–309.  
747 <https://doi.org/10.1016/j.ympev.2008.09.028>
- 748 Almeida E.A.B., Pie M.R., Brady S.G., Danforth B.N. 2012. Biogeography and  
749 diversification of colletid bees (Hymenoptera: Colletidae): emerging patterns from the  
750 southern end of the world. *J. Biogeogr.* 39: 526–544. [https://doi.org/10.1111/j.1365-](https://doi.org/10.1111/j.1365-2699.2011.02624.x)  
751 [2699.2011.02624.x](https://doi.org/10.1111/j.1365-2699.2011.02624.x)
- 752 Ascher J.S. in Rozen J.R. Jr. 2003. Appendix: Evidence for the phylogenetic position of  
753 *Nolanomelissa* from nuclear EF-1a sequence data. In: Melo G.A.R., Alves-dos-Santos I.,  
754 editors. *Apoidea Neotropica: Homenagem aos 90 Anos de Jesus Santiago Moure*.  
755 Criciúma: UNESC. p. 107–108.
- 756 Ascher J.S. 2004. Systematics of the bee family Andrenidae (Hymenoptera: Apoidea). Ithaca:  
757 Cornell University, PhD Thesis. 333 p.
- 758 Ascher J.S., Danforth B.N., Ji S. 2001. Phylogenetic utility of the major opsin in bees  
759 (Hymenoptera: Apoidea): a reassessment. *Mol. Phylogenet. Evol.* 19(1): 76–93.  
760 <https://doi.org/10.1006/mpev.2001.0911>
- 761 Ascher J.S., Engel M.S. 2017. A new species of *Mermiglossa* from Kenya, with comments on  
762 the arrangement of Old World Panurginae (Hymenoptera: Andrenidae). *J. Melittol.* 75: 1–  
763 11. <http://dx.doi.org/10.17161/jom.v0i75.6717>
- 764 Ascher J.S., Pickering J. 2020. Discover life bee species guide and world checklist  
765 (Hymenoptera, Apoidea, Anthophila).  
766 [http://www.discoverlife.org/mp/20q?guide=Apoidea\\_species](http://www.discoverlife.org/mp/20q?guide=Apoidea_species) (accessed 10 November  
767 2020).

- 768 Bacon C.D., Mora A., Wagner W.L., Jaramillo C.A. 2013. Testing geological models of  
769 evolution of the Isthmus of Panama in a phylogenetic framework. *Bot. J. Linn. Soc.* 171:  
770 287–300. <https://doi.org/10.1111/j.1095-8339.2012.01281.x>
- 771 Bacon C.D., Silvestro D., Jaramillo C., Smith B.T., Chakrabarty P., Antonelli A. 2015.  
772 Biological evidence supports an early and complex emergence of the Isthmus of Panama.  
773 *Proc. Natl. Acad. Sci.* 112: 6110–6115. <https://doi.org/10.1073/pnas.1423853112>
- 774 Behrensmeyer A.K., Turner A. 2013. Taxonomic occurrences of Suidae recorded in the  
775 Paleobiology Database. Fossilworks. <http://fossilworks.org> (accessed 20 February 2020).
- 776 Brikiatis L. 2014. The De Geer, Thulean and Beringia routes: key concepts for understanding  
777 early Cenozoic biogeography. *J. Biogeog.* 41: 1036–1054.  
778 <https://doi.org/10.1111/jbi.12310>
- 779 Bouckaert R., Heled J., Kühnert D., Vaughan T., Wu C.H., Xie D., Suchard M.A., Rambaut  
780 A., Drummond A.J. 2014. BEAST 2: A Software Platform for Bayesian Evolutionary  
781 Analysis. *PLoS Comput. Biol.* 10(4): e1003537.  
782 <https://doi.org/10.1371/journal.pcbi.1003537>
- 783 Cardinal S. 2018. Bee (Hymenoptera: Apoidea: Anthophila) diversity through time. *Insect*  
784 *Biodivers.: Sci. Soc.* 2: 851–867. <https://doi.org/10.1002/9781118945582.ch28>
- 785 Cardinal S., Buchmann S.L., Russell A.L. 2018. The evolution of floral sonication, a pollen  
786 foraging behavior used by bees. *Evol.* 72: 590–600. <https://doi.org/10.1111/evo.13446>
- 787 Cardinal S., Danforth B.N. 2013. Bees diversified in the age of eudicots. *Proc. Biol. Sci.* 280:  
788 20122686. <https://doi.org/10.1098/rspb.2012.2686>
- 789 Case J.A., Goin F.J., Woodburne M.O. 2005. “South American” marsupials from the Late  
790 Cretaceous of North America and the origin of marsupial cohorts. *J. Mamm. Evol.* 12:  
791 461–494. <https://doi.org/10.1007/s10914-005-7329-3>

- 792 Chintauan-Marquier I.C., Jordan S., Berthier P., Amédégnato C., Pompanon F. 2010.  
793 Evolutionary history and taxonomy of a Short-horned grasshopper subfamily: the  
794 Melanoplineae (Orthoptera: Acrididae). *Mol. Phylogenet. Evol.* 58: 22–32.  
795 <https://doi.org/10.1016/j.ympev.2010.07.003>
- 796 Cione L., Gasparini G.M., Soibelzon E., Soibelzon L.H., Tonni E.P. 2015. The Great  
797 American Biotic Interchange: A South American Perspective. Springer Verlag, London.
- 798 Coates A.G., Stallard R.F. 2013. How old is the Isthmus of Panama? *Bull. Mar. Sci.* 89: 801–  
799 813. <https://doi.org/10.5343/bms.2012.1076>
- 800 Cody S., Richardson J.E., Rull V., Ellis C., Pennington R.T. 2010. The Great American Biotic  
801 Interchange revisited. *Ecogr.* 33: 326–332. [https://doi.org/10.1111/j.1600-](https://doi.org/10.1111/j.1600-0587.2010.06327.x)  
802 [0587.2010.06327.x](https://doi.org/10.1111/j.1600-0587.2010.06327.x)
- 803 Compagnucci L.A. 2015. Revisión del género *Spinoliella* Ashmead (Apoidea, Andrenidae) en  
804 la Argentina, con descripción de cuatro nuevas especies. *Rev. del Mus. Arg. Cie. Nat.* 17:  
805 77–86.
- 806 Danforth B.N. 1996. Phylogenetic analysis and taxonomic revision of the *Perdita* subgenera  
807 *Macrotera*, *Macroteropsis*, *Macroterella* and *Cockerellula*. *Univ. Kansas Sci. Bull.* 55:  
808 635–692.
- 809 Danforth B.N., Brady S.G., Sipes S.D., Pearson A. 2004. Single-copy nuclear genes recover  
810 Cretaceous-age divergences in bees. *Syst. Biol.* 53: 309–326.  
811 <https://doi.org/10.1080/10635150490423737>
- 812 Danforth B.N., Fang J., Sipes S. 2006a. Analysis of family-level relationships in bees  
813 (Hymenoptera: Apiformes) using 28S and two previously unexplored nuclear genes: CAD  
814 and RNA polymerase II. *Mol. Phylogenet. Evol.* 39: 358–372.  
815 <https://doi.org/10.1016/j.ympev.2005.09.022>

- 816 Danforth B.N., Sipes S., Fang J., Brady S.G. 2006b. The history of early bee diversification  
817 based on five genes plus morphology. *Proc. Nat. Acad. Sci., USA.* 103: 15118–15123.  
818 <https://doi.org/10.1073/pnas.0604033103>
- 819 Danforth B.N., Cardinal S., Praz C., Almeida E.A.B., Michez D. 2013. The Impact of  
820 Molecular Data on Our Understanding of Bee Phylogeny and Evolution. *Ann. Rev.*  
821 *Entomol.* 58: 57–78. <https://doi.org/10.1146/annurev-ento-120811-153633>
- 822 deMenocal P., Ortiz J., Guilderson T., Adkins J., Sarnthein M., Baker L., Yarusinsky M.  
823 2000. Abrupt onset and termination of the African humid period: rapid climate responses  
824 to gradual insolation forcing. *Quat. Sci. Rev.* 19: 347–361. [https://doi.org/10.1016/S0277-](https://doi.org/10.1016/S0277-3791(99)00081-5)  
825 [3791\(99\)00081-5](https://doi.org/10.1016/S0277-3791(99)00081-5)
- 826 Dubitzky A., Plant J., Schonitzer K. 2010. Phylogeny of the bee genus *Andrena* Fabricius  
827 based on morphology. *Mitt. Munch. Entomol. Ges.* 100: 137–202.
- 828 Edler D., Klein J., Antonelli A., Silvestro D. 2020. raxmlGUI 2.0 beta: a graphical interface  
829 and toolkit for phylogenetic analyses using RAxML. *Methods Ecol. Evol.* 2020: 1–5.  
830 <http://dx.doi.org/https://doi.org/10.1111/2041-210X.13512>
- 831 Engel M.S. 2005. Family-group names for bees (Hymenoptera: Apoidea). *Am. Mus. Nat. His.*  
832 3476: 1–33. [https://doi.org/10.1206/0003-0082\(2005\)476\[0001:FNFBHA\]2.0.CO;2](https://doi.org/10.1206/0003-0082(2005)476[0001:FNFBHA]2.0.CO;2)
- 833 Engel M.S, Hinojosa-Díaz I.A., Rasnitsyn A.P. 2009. A honey bee from the Miocene of  
834 Nevada and the biogeography of *Apis* (Hymenoptera: Apidae: Apini). *Proc. Calif. Acad.*  
835 *Sci.* 60: 23–38.
- 836 Engel M.S. 2015. A review of the genera and subgenera of Oxaeinae (Hymenoptera:  
837 Andrenidae). *J. Melittology.* 52: 1–18. <https://doi.org/10.17161/jom.v0i52.4902>
- 838 Espeland M., Hall J.P.W., DeVries P.J., Lees D.C., Cornwall M., Hsu Y., Wu L., Campbell  
839 D.L., Talavera G., Vila R., Salzman S., Ruehr S., Lohman D.J., Pierce N.E. 2015. Ancient  
840 Neotropical origin and recent recolonization: phylogeny, biogeography and diversification

- 841 of the Riodinidae (Lepidoptera: Papilionoidea). *Mol. Phylogenet. Evol.* 93: 296–306.  
842 <https://doi.org/10.1016/j.ympev.2015.08.006>
- 843 Evangelista O., Sakakibara A.M., Cryan J.R., Urban J.M. 2017. A phylogeny of the  
844 treehopper subfamily Heteronotinae reveals convergent pronotal traits (Hemiptera:  
845 Auchenorrhyncha: Membracidae). *Syst. Entomol.* 42: 410–428.  
846 <https://doi.org/10.1111/syen.12221>
- 847 Farris D., Jaramillo C., Bayona G., Restrepo-Moreno S.A., Montes C., Cardona A., Mora A.,  
848 Speakman R., Glascock M., Valencia V. 2011. Fracturing of the Panamanian Isthmus  
849 during initial collision. *Geol.* 39: 1007–1010. <https://doi.org/10.1130/G32237.1>
- 850 Giunta G., Orioli S. 2011. The Caribbean Plate Evolution: Trying to Resolve a very  
851 Complicated Tectonic Puzzle. In: Sharkov, E. (Ed.). *New Frontiers in Tectonic Research -*  
852 *General Problems, Sedimentary Basins and Island Arcs.* Rijeka, Croatia: InTech, pp. 221–  
853 248.
- 854 Goin F.J., Gelfo J.N., Chornogubsky L., Woodburne M.O., Martin T. 2012. Origins,  
855 radiations, and distribution of South American mammals: from greenhouse to icehouse  
856 worlds. In: Patterson, B.D., Costa, L.P. (Eds.) *Bones, Clones, and Biomes: The History*  
857 *and Geography of Recent Neotropical Mammals.* University of Chicago Press, Chicago,  
858 pp. 20–50.
- 859 Gonzalez V.H., Engel M.S. 2016. A new species of *Callonychium* Brèthes from Argentina  
860 (Hymenoptera: Andrenidae). *Euroasian Entomol. J.* 15: 31–34.
- 861 Gonzalez V.H., Smith-Pardo A.H., Engel M.S. 2017. Phylogenetic relationships of a new  
862 genus of callipsine bees from Peru, with a review of *Spinoliella* Ashmead (Hymenoptera,  
863 Andrenidae). *Bul. Am. Mus. Nat. Hist.* 412: 1–71. [https://doi.org/10.1206/0003-0090-](https://doi.org/10.1206/0003-0090-412.1.1)  
864 [412.1.1](https://doi.org/10.1206/0003-0090-412.1.1)

- 865 Graf V. 1966. A posição sistemática de Oxaeinae (Hymenoptera-Apoidea). *Cienc. Cult.* 18:  
866 137–138.
- 867 Graham A. 1999. *Late Cretaceous and Cenozoic History of North American Vegetation*.  
868 Oxford University Press, New York.
- 869 Hall T.A. 1999. BioEdit: a user-friendly biological sequence alignment editor and analysis  
870 program for Windows 95/98/NT. *Nucleic Acids Symp. Ser.* 41: 95–98
- 871 Hedtke S., Patiny S., Danforth B.N. 2013. The bee tree of life: A supermatrix approach to  
872 apoid phylogeny and biogeography. *BMC Evol. Biol.* 13: 138.  
873 <https://doi.org/10.1186/1471-2148-13-138>
- 874 Hines H.M. 2008. Historical biogeography, divergence times, and diversification patterns of  
875 bumble bees (Hymenoptera: Apidae: *Bombus*). *Syst. Biol.* 57: 58–75.  
876 <https://doi.org/10.1080/10635150801898912>
- 877 Hurd P.D. Jr, Linsley E.G. 1976. The bee family Oxaeidae with a revision of the North  
878 American species (Hymenoptera: Apoidea). *Smithson. Contrib. Zool.* 220: 1–75.
- 879 Iturralde-Vinent M.A., MacPhee R.D.E. 1999. Paleogeography of the Caribbean region:  
880 implications for Cenozoic biogeography. *Bull. Am. Mus. Nat. Hist.* 238: 1–95.
- 881 Katoh K., Rozewicki J., Yamada K.D. 2019. MAFFT online service: multiple sequence  
882 alignment, interactive sequence choice and visualization. *Brief. Bioinform.* 20: 1160–1166.  
883 <https://doi.org/10.1093/bib/bbx108>
- 884 Kirby M.X., Jones D.S., MacFadden B.J. 2008. Lower Miocene stratigraphy along the  
885 Panama Canal and its bearing on the Central American Peninsula. *PLoS One* 3(7): e2791.  
886 <https://doi.org/10.1371/journal.pone.0002791>
- 887 Larkin L., Neff L.J., Simpson B.B. 2006. Phylogeny of the *Callandrena* subgenus of *Andrena*  
888 (Hymenoptera: Andrenidae) based on mitochondrial and nuclear DNA data: Polyphyly and

- 889 convergent evolution. *Mol. Phylogenet. Evol.* 38: 330–343.  
890 <https://doi.org/10.1016/j.ympev.2005.10.003>
- 891 Landis M.J., Matzke N.J., Moore B.R., Huelsenbeck J.P. 2013. Bayesian analysis of  
892 biogeography when the number of areas is large. *Syst. Biol.* 62(6): 789–804.  
893 <https://doi.org/10.1093/sysbio/syt040>
- 894 Lanfear R., Frandsen P.B., Wright A.M., Senfeld T., Calcott B. 2017. PartitionFinder 2: New  
895 methods for selecting partitioned models of evolution for molecular and morphological  
896 phylogenetic analyses. *Mol. Biol. Evol.* 34(3): 772–773.  
897 <https://doi.org/10.1093/molbev/msw260>
- 898 Litman J.R., Danforth B.N., Eardley C.D., Praz C.J. 2011. Why do leafcutter bees cut leaves?  
899 New insights into the early evolution of bees. *Proc. R. Soc. B.* 278: 3593–600.  
900 <https://doi.org/10.1098/rspb.2011.0365>
- 901 Martins A.C., Melo G.A.R. 2016. The New World oil-collecting bees *Centris* and *Epicharis*  
902 (Hymenoptera, Apidae): Molecular phylogeny and biogeographic history. *Zool. Scr.* 45:  
903 22–33. <https://doi.org/10.1111/zsc.12133>
- 904 Matzke N.J. 2013. BioGeoBEARS: BioGeography with Bayesian (and Likelihood)  
905 Evolutionary Analysis in R Scripts. <http://cran.r-project.org/package=BioGeoBEARS>  
906 (accessed 15 February 2021).
- 907 Matzke N.J. 2014. Model selection in historical biogeography reveals that founder-event  
908 speciation is a crucial process in island clades. *Syst. Biol.* 63(6): 951–970.  
909 <https://doi.org/10.1093/sysbio/syu056>
- 910 Melo G.A.R., Gonçalves R.B. 2005. Higher-level bee classifications (Hymenoptera, Apoidea,  
911 Apidae sensu lato). *Rev. Bras. Zool.* 22(1): 153–159. [https://doi.org/10.1590/S0101-](https://doi.org/10.1590/S0101-81752005000100017)  
912 [81752005000100017](https://doi.org/10.1590/S0101-81752005000100017)

- 913 Michener C.D. 1944. Comparative External Morphology, Phylogeny, and a Classification of  
914 the Bees (Hymenoptera). *Bull. Am. Mus. Nat. Hist.* 82: 151–326.
- 915 Michener C.D. 1979. Biogeography of the bees. *Ann. Mo. Bot. Garden.* 66: 277–347.  
916 <https://doi.org/10.2307/2398833>
- 917 Michener C.D. 2000. *The Bees of the World*. The Johns Hopkins University Press, Baltimore.
- 918 Michener C.D. 2007. *The Bees of the World*. 2nd Edition. The Johns Hopkins University  
919 Press, Baltimore.
- 920 Miller M.A., Pfeiffer W., Schwartz T. 2011. Creating the CIPRES Science Gateway for  
921 Inference of Large Phylogenetic Trees. *Gateway Computing Environments*. New Orleans.  
922 p. 1–8. <https://doi.org/10.1145/2016741.2016785>
- 923 Montes C., Cardona A., McFadden R., Morón S.E., Silva C.A., Restrepo-Moreno S., Ramírez  
924 D.A., Hoyos N., Wilson J., Farris D., Bayona G.A., Jaramillo C.A., Valencia V., Bryan J.,  
925 Flores J.A. 2012. Evidence for middle Eocene and younger land emergence in central  
926 Panama: implications for Isthmus closure. *Geol. Soc. Am. Bull.* 124: 780–799.  
927 <https://doi.org/10.1130/B30528.1>
- 928 Montes C., Cardona A., Jaramillo C., Pardo A., Silva J.C., Valencia V., Ayala C., Pérez-  
929 Angel L.C., Rodríguez-Parra L.A., Ramírez V., Niño H. 2015. Middle Miocene closure of  
930 the Central American Seaway. *Sci.* 348: 226–229. <https://doi.org/10.1126/science.aaa2815>
- 931 Moure, J.S., Urban D., Melo G.A.R. 2012. *Andreninae Latreille, 1802. Catalogue of Bees*  
932 *(Hymenoptera, Apoidea) in the Neotropical Region - online version.*  
933 <http://www.moure.cria.org.br/catalogue> (accessed 10 March 2021).
- 934 O’Dea A., Lessios H.A., Coates A.G., Eytan R.I., Restrepo-Moreno S.A., Cione A.L., Collins  
935 L.S., Queiroz A., Farris D.W., Norris R.D., Stallard R.F., Woodburne M.O., Aguilera O.,  
936 Aubry M.P., Berggren W.A., Budd A.F., Cozzuol M.A., Coppard S.E., Duque-Caro H.,  
937 Finnegan S., Gasparini G.M., Grossmann E.L., Johnson K.G., Keigwin L.D., Knowlton N.,



- 938 Leigh E.G., Leonard-Pingel J.S, Marko P.B., Pyenson N.D., Racheillo-Dolmen P.G.,  
939 Soilbelzon E., Soilbelzon L., Todd J.A., Vermeij G.J., Jackson J.B.C. 2016. Formation of  
940 the Isthmus of Panama. *Sci. Adv.* 2(8): e1600883. <https://doi.org/10.1126/sciadv.1600883>
- 941 Ortiz-Jaureguizar E., Pascual R. 2007. The Tectonic Setting of the Caribbean Region: Key in  
942 the Radical Late Cretaceous-Early Paleocene South American Land Mammal Turnover. In:  
943 Díaz-Martínez E., Rábano I., (Eds.). Fourth European Meeting on the Palaeontology and  
944 Stratigraphy of Latin America. Instituto Geológico y Minero de España, Cuadernos del  
945 Museo Geominero n° 8, Madrid, pp. 301–307.
- 946 Packer L., Ruz L. 2017. DNA barcoding the bees (Hymenoptera: Apoidea) of Chile: species  
947 discovery in a reasonably well-known bee fauna with the description of a new species of  
948 *Lonchopria* (Colletidae). *Genome* 60: 414–430. <https://doi.org/10.1139/gen-2016-0071>
- 949 Patiny S. 1999. Etude Phylogénétique des Panurginae de l' ancien monde (Hymenoptera,  
950 Andrenidae). *Linzer Biolog Beiträge* 31: 249-275.
- 951 Peters R.S., Krogmann L., Mayer C., Donath A., Gunkel S., Meusemann K., Kozlov A.,  
952 Podsiadlowski L., Petersen M., Lanfear R., Diez P.A., Heraty J., Kjer K.M., Klopstein S.,  
953 Meier R., Polidori C., Schmitt T., Liu S., Zhou X., Wappler T., Rust J., Misof B., Niehuis  
954 O. 2017. Evolutionary history of the Hymenoptera. *Curr. Biol.* 27: 1013–1018.  
955 <https://doi.org/10.1016/j.cub.2017.01.027>
- 956 Pindell J., Kennan L. 2009. Tectonic evolution of the Gulf of Mexico, Caribbean and northern  
957 South America in the mantle reference frame: an update. *Geol. Soc. Spec. Publ.* 328: 1-55.  
958 <https://doi.org/10.1144/SP328.1>
- 959 Pisanty G., Richter R., Martin T., Dettman J., Cardinal S. 2021. Molecular phylogeny,  
960 historical biogeography and revised classification of andrenine bees (Hymenoptera:  
961 Andrenidae) (Hymenoptera: Andrenidae). *Mol. Phylogenet. Evol.* In press: 107151.  
962 <https://doi.org/10.1016/j.ympev.2021.107151>

- 963 Praz C.J., Packer L. 2014. Phylogenetic position of the bee genera *Ancyla* and *Tarsalia*  
964 (Hymenoptera: Apidae): a remarkable base compositional bias and an early Paleogene  
965 geodispersal from North America to the Old World. *Mol. Phylogenet. Evol.* 81: 258–270.  
966 <https://doi.org/10.1016/j.ympev.2014.09.003>
- 967 Rambaut A., Drummond A.J., Xie D., Baele G., Suchard M.A. 2018. Posterior summarization  
968 in Bayesian phylogenetics using Tracer 1.7. *Syst. Biol.* 67(5): 901–904.  
969 <https://doi.org/10.1093/sysbio/syy032>
- 970 Rambaut A. 2016. FigTree: Tree figure drawing tool, version 1.4.3.  
971 <http://tree.bio.ed.ac.uk/software/gtree>. (accessed 10 February 2020)
- 972 Ramírez S.R., Roubik D.W., Skov C.E., Pierce N.E. 2010. Phylogeny, diversification patterns  
973 and historical biogeography of euglossine orchid bees (Hymenoptera: Apidae). *Biol. J.*  
974 *Linn. Soc.* 100: 552–72. <https://doi.org/10.1111/j.1095-8312.2010.01440.x>
- 975 Ramos K.S. 2013. The bee genus *Arhysosage* Brèthes (Apidae: Andreninae: Calliopsini): new  
976 species, taxonomic notes and new distribution records from Brazil. *J. Nat. Hist.* 47(43–44):  
977 2735–2747. <https://doi.org/10.1080/00222933.2013.791887>
- 978 Ree R.H., Smith S.A. 2008. Maximum likelihood inference of geographic range evolution by  
979 dispersal, local extinction, and cladogenesis. *Syst. Biol.* 57(1): 4–14.  
980 <https://doi.org/10.1080/10635150701883881>
- 981 Roig-Alsina A., Compagnucci L.A. 2003. Description, phylogenetic relationships, and  
982 biology of *Litocalliopsis adesmiae*, a new genus and species of South American calliopsine  
983 bees (Hymenoptera, Andrenidae). *Rev. Mus. Arg. Cie. Nat.* 5(1): 99–112.
- 984 Ronquist F. 1997. Dispersal-vicariance analysis: a new approach to the quantification of  
985 historical biogeography. *Syst. Biol.* 46(1): 195–203.  
986 <https://doi.org/10.1093/sysbio/46.1.195>

- 987 Ronquist F., Teslenko M., Van der Mark P., Ayres D.L., Darling A., Hohna S., Larget B., Liu  
988 L., Suchard M.A., Huelsenbeck J.P. 2012. MrBayes 3.2: efficient Bayesian phylogenetic  
989 inference and model choice across a large model space. *Syst. Biol.* 61: 539–542.  
990 <https://doi.org/10.1093/sysbio/sys029>
- 991 Rozen, J.G. Jr. 1965 The biology and immature stages of *Melitturga clavicornis* (Latreille)  
992 and of *Sphecodes albilabris* (Kirby) and the recognition of the Oxaeidae at the family level  
993 (Hymenoptera, Apoidea). *Am. Mus. Nov.* 2224: 1–18.
- 994 Rozen, J.G. Jr. 1989. Life history studies of the "primitive" panurgine bees (Hymenoptera:  
995 Andrenidae: Panurginae). *Am. Mus. Novit.* 2962: 1–27.
- 996 Rozen, J.G. Jr. 1993. Phylogenetic relationships of *Euherbstia* with other short-tongued bees  
997 (Hymenoptera: Apoidea). *Am. Mus. Novit.* 3060: 1–17.
- 998 Rozen, J.G. Jr. 1994. Biologies of the bee genera *Ancylandrena* (Andrenidae: Andreninae)  
999 and *Hexepeolus* (Apidae: Nomadinae), and phylogenetic relationships of *Ancylandrena*  
1000 based on its mature larvae (Hymenoptera: Apoidea). *Am. Mus. Novit.* 3108: 1–19.
- 1001 Rozen J.G. Jr 2003. A new tribe, genus, and species of South American panurgine bee  
1002 (Andrenidae, Panurginae), oligolectic on *Nolana* (Nolanaceae). In Melo G.A.R. & Alves-  
1003 dos-Santos I. (Eds.). *Apoidea Neotropica: Homenagem aos 90 Anos de Jesus Santiago*  
1004 *Moure*. Editora UNESC, Criciúma, pp. 93–108.
- 1005 Rozen J.G. Jr. 2013. Mature larvae of calliopsine bees: *Spinoliella*, *Callonychium*, and  
1006 *Arhysosage* including biological notes, and a larval key to calliopsine genera  
1007 (Hymenoptera: Apoidea: Andrenidae: Panurginae). *Am. Mus. Novit.* 3782: 1–27.  
1008 <https://doi.org/10.1206/3782.2>
- 1009 Rozen J.G. Jr. 1964 [1965]. Phylogenetic-taxonomic significance of last instar of *Protoxaea*  
1010 *gloriosa* Fox, with descriptions of first and last instars (Hymenoptera: Apoidea). *J. New*  
1011 *York Entomol. Soc.* 72: 223–230.

- 1012 Rozen J.G. Jr. 1965. The biology and immature stages of *Melitturga clavicornis* (Latreille)  
1013 and of *Sphecodes albilabris* (Kirby) and the recognition of the Oxaeidae at the family level  
1014 (Hymenoptera, Apoidea). Am. Mus. Novit. 2224: 1–18.
- 1015 Rozen J.G. Jr. 1993. Phylogenetic relationships of *Euherbstia* with other short-tongued bees  
1016 (Hymenoptera: Apoidea). Am. Mus. Novit. 3060: 1–17.
- 1017 Rozen J.G. Jr. 1994. Biologies of the bee genera *Ancylandrena* (Andrenidae: Andreninae) and  
1018 *Hexepeolus* (Apidae: Nomadinae), and phylogenetic relationships of *Ancylandrena* based  
1019 on its mature larvae (Hymenoptera: Apoidea). Am. Mus. Novit. 3108: 1–19.
- 1020 Rozen, J.G. Jr and Ruz L. 1995. South American Panurgine bees (Andreninae: Panurginae),  
1021 Part. II. Adults, immature stages and biology of *Neffapis longilingua*, a new genus and  
1022 species with elongated glossa. Am. Mus. Novit. 3136: 1–15.
- 1023 Ruz L. 1986. Classification and phylogenetic relationships of the panurgine bees  
1024 (Hymenoptera - Andrenidae). University of Kansas, PhD dissertation, Lawrence.
- 1025 Ruz L. 1991. Classification and phylogenetic relationships of the panurgine bees: The  
1026 Calliopsini and allies (Hymenoptera: Andrenidae). Univ. Kans. Sci. Bull. 54: 209–256.
- 1027 Sann M., Niehuis O., Peters R.S., Mayer C., Kozlov A., Podsiadlowski L., Bank S.,  
1028 Meusemann K., Misof B., Bleidorn C., Ohl M. 2018. Phylogenomic analysis of Apoidea  
1029 sheds new light on the sister group of bees. BMC Evol. Biol. 18(1): 71.  
1030 <https://doi.org/10.1186/s12862-018-1155-8>
- 1031 Sanmartín I., Enghoff H., Ronquist F. 2001. Patterns of animal dispersal, vicariance and  
1032 diversification in the Holarctic. Biol. J. Linn. Soc. 73: 345–390.  
1033 <https://doi.org/10.1111/j.1095-8312.2001.tb01368.x>
- 1034 Schlindwein C., Moure J.S. 2005. *Protomelitturga catimbaui* sp. nov. (Hymenoptera,  
1035 Andrenidae), a segunda espécie da tribo Protomeliturgini. Rev. Bras. Zool. 22: 833–835.  
1036 <https://doi.org/10.1590/S0101-81752005000400004>

- 1037 Scotese C.R. 2014. Atlas of Neogene Paleogeographic Maps (Mollweide Projection), Maps 1-  
1038 7, Volume 1, The Cenozoic, PALEOMAP Atlas for ArcGIS, PALEOMAP Project,  
1039 Evanston.
- 1040 Simpson B.B., Neff J.L. 1985. Plants, their pollinating bees, and the great American  
1041 interchange. In: Stehli F.G, Webb S.D. (Eds.). The Great American Biotic Interchange:  
1042 Plenum Publishing Corporatio, pp. 427–452.
- 1043 Shanahan T.M., McKay N.P., Hughen K.A., Overpeck J.T., Otto-Bliesner B., Heil C.W.,  
1044 King J., Scholz C.A., Peck J. 2015. The time-transgressive termination of the African  
1045 Humid Period. *Nat. Geosci.* 8: 140–144. <https://doi.org/10.1038/ngeo2329>
- 1046 Staden R., Beal K.F., Bonfield J.K. 1998. The Staden package, 1998. *Methods Mol Biol.* 132:  
1047 115-130. <https://doi.org/10.1385/1-59259-192-2:115>
- 1048 Stamatakis A. 2006. RAxML-VI-HPC: maximum likelihood-based phylogenetic analyses  
1049 with thousands of taxa and mixed models. *Bioinform* 22: 2688–2690.  
1050 <https://doi.org/10.1093/bioinformatics/btl446>
- 1051 Sturge R.J., Jacobsen F., Rosensteel B.B., Neale R.J., Omland K.E. 2009. Colonization of  
1052 South America from Caribbean islands confirmed by molecular phylogeny with increased  
1053 taxon sampling. *Condor* 111(3): 575–579. <https://doi.org/10.1525/cond.2009.080048>
- 1054 Taylor D.W. 1991. Paleobiogeographic relationships of Andean angiosperms of Cretaceous to  
1055 Pliocene age. *Palaeogeogr. Palaeoclimatol. Palaeoecol.* 88: 69–84.  
1056 [https://doi.org/10.1016/0031-0182\(91\)90015-J](https://doi.org/10.1016/0031-0182(91)90015-J)
- 1057 Turchetto □ Zolet A.C., Pinheiro F., Salgueiro F., Palma □ Silva C. 2013. Phylogeographical  
1058 patterns shed light on evolutionary process in South America. *Mol. Ecol.* 22: 1193–1213.  
1059 <https://doi.org/10.1111/mec.12164>

- 1060 Vaidya G., Lohman D.J., Meier R. 2011. SequenceMatrix: concatenation software for the fast  
1061 assembly of multi-gene datasets with character set and codon information. *Cladistics* 27:  
1062 171–180. <https://doi.org/10.1111/j.1096-0031.2010.00329.x>
- 1063 Wilson J.S., Carril O.M., Sipes S.D. 2014. Revisiting the Great American Biotic Interchange  
1064 through analyses of amphitropical bees. *Ecog.* 37: 791–796.  
1065 <https://doi.org/10.1111/ecog.00663>
- 1066 Woodburne M.O. 2010. The Great American Biotic Interchange: dispersals, tectonics,  
1067 climate, sea level and holding pens. *J. Mamm. Evol.* 17: 245–264.  
1068 <https://doi.org/10.1007/s10914-010-9144-8>
